# Supplementary material for: Predictors of physical activity among older adults in Germany: a nationwide cohort study
Source: PubMed Central journal article supplement — BMJ Open. 2018 May 9;8(5):e021940. doi: 10.1136/bmjopen-2018-021940 (PMC5942462; doi:10.1136/bmjopen-2018-021940), 2018-05-09
Supplement: bmjopen-2018-021940.draft_revisions.pdf [file bmjopen-2018-021940.draft_revisions.pdf]

# BMJ Open

BMJ Open is committed to open peer review. As part of this commitment we make the peer review history of every article we publish publicly available.

When an article is published we post the peer reviewers' comments and the authors' responses online. We also post the versions of the paper that were used during peer review. These are the versions that the peer review comments apply to.

The versions of the paper that follow are the versions that were submitted during the peer review process. They are not the versions of record or the final published versions. They should not be cited or distributed as the published version of this manuscript.

BMJ Open is an open access journal and the full, final, typeset and author-corrected version of record of the manuscript is available on our site with no access controls, subscription charges or pay-per-view fees (<http://bmjopen.bmj.com>).

If you have any questions on BMJ Open's open peer review process please email [info.bmjopen@bmj.com](mailto:info.bmjopen@bmj.com)

# BMJ Open

## Determinants of physical activity among older adults in Germany – a nationwide cohort study

|                               |                                                                                                                                                                                                                                                                                                                                                                                                                                                                                                                                                         |
|-------------------------------|---------------------------------------------------------------------------------------------------------------------------------------------------------------------------------------------------------------------------------------------------------------------------------------------------------------------------------------------------------------------------------------------------------------------------------------------------------------------------------------------------------------------------------------------------------|
| Journal:                      | <i>BMJ Open</i>                                                                                                                                                                                                                                                                                                                                                                                                                                                                                                                                         |
| Manuscript ID                 | bmjopen-2018-021940                                                                                                                                                                                                                                                                                                                                                                                                                                                                                                                                     |
| Article Type:                 | Research                                                                                                                                                                                                                                                                                                                                                                                                                                                                                                                                                |
| Date Submitted by the Author: | 25-Jan-2018                                                                                                                                                                                                                                                                                                                                                                                                                                                                                                                                             |
| Complete List of Authors:     | Manz, Kristin; Robert Koch Institute, Department of Epidemiology and Health Monitoring<br>Mensink, Gert; Robert Koch Institute, Department of Epidemiology and Health Monitoring<br>Jordan, S; Robert Koch Institute, Department of Epidemiology and Health Monitoring<br>Schienkiewitz, Anja; Robert Koch Institute, Department of Epidemiology and Health Monitoring<br>Krug, S; Robert Koch Institute, Department of Epidemiology and Health Monitoring<br>Finger, Jonas D.; Robert Koch Institute, Department of Epidemiology and Health Monitoring |
| Keywords:                     | Physical activity, Determinants, Healthy aging, Older people, Germany                                                                                                                                                                                                                                                                                                                                                                                                                                                                                   |
|                               |                                                                                                                                                                                                                                                                                                                                                                                                                                                                                                                                                         |

SCHOLARONE™  
Manuscripts

1  
2  
3 **1 Determinants of physical activity among older adults in Germany – a nationwide cohort**  
4 **2 study**

5  
6 3

7  
8 4 Kristin Manz<sup>1</sup>, Gert B. M. Mensink<sup>1</sup>, Susanne Jordan<sup>1</sup>, Anja Schienkiewitz<sup>1</sup>, Susanne Krug<sup>1</sup>, Jonas D.  
9 5 Finger<sup>1\*</sup>

10 6  
11 7  
12 8 <sup>1</sup>Robert Koch Institute, Department of Epidemiology and Health Monitoring, Berlin, Germany

13 9  
14  
15 10 \*Corresponding author:

16 11 Jonas D. Finger, PhD

17 12 Email: FingerJ@rki.de

18 13 Address: Robert Koch-Institute, Department of Epidemiology and Health Monitoring, PO Box 650261,  
19 14 13302 Berlin, Germany

1  
2  
3 15 **Abstract**  
4

5  
6 16 **Objectives**  
7

8 17 To investigate individual, interpersonal and environmental determinants of regular aerobic physical  
9  
10 18 activity (PA) participation among older adults in Germany.

11  
12 19 **Design**  
13

14 20 Population-based cohort study.

15  
16 21 **Setting**  
17

18 22 Cluster-randomized general population sample selected based on population registry address  
19  
20 23 information from 130 nationally distributed sample points collected from 1997-1999 and re-  
21  
22 24 evaluated 12 years later from 2008-2011.

23  
24 25 **Participants**  
25

26 26 1184 adults, aged 65 years or older at follow-up with complete data at baseline and follow-up were  
27  
28 27 included in the final study sample.

29  
30 31 **Outcome measure**  
32

33 29 Regular 'aerobic PA  $\geq$  1 day/week' assessed based on self-reported information.

34  
35 30 **Results**  
36

37 31 At follow-up, 53.2 % of the participants engaged in aerobic PA  $\geq$  1 day/week. Participants aged 50 to  
38  
39 32 60 years at baseline were more likely to engage in aerobic PA  $\geq$  1 day/week than participants aged 61  
40  
41 33 to 78 years; odds ratio (OR): 1.88, 95% CI: 1.46-2.40. Participants with middle and high  
42  
43 34 socioeconomic status (SES) were more likely to engage in aerobic PA  $\geq$  1 day/week than participants  
44  
45 35 with low SES; OR middle SES: 2.08, 1.33-3.25; high SES 3.44, 2.11-5.60. Participants with high social  
46  
47 36 support were more likely to engage in aerobic PA  $\geq$  1 day/week at follow up than participants with  
48  
49 37 low social support; OR 1.98, 1.26-3.12. Furthermore, participants who engaged in leisure-time PA at  
50  
51 38 least once per week at baseline were more likely to engage in aerobic PA  $\geq$  1 day/week at follow up  
52  
53 39 than those who engaged less than once per week; OR 1.95, 1.46-2.60.  
54  
55  
56  
57  
58  
59  
60

1  
2  
3 41 **Conclusions**

4  
5 42 Several influencing factors assessed at middle age predicted regular aerobic PA participation twelve  
6  
7 43 years later. These factors should be considered when planning interventions to prevent physical  
8  
9 44 inactivity in older adults. There is great potential to increase aerobic PA participation in older adults  
10  
11 45 in Germany, in particular among those with low SES and low social support.  
12

13 46

14  
15 47 **Keywords**

16  
17  
18 48 Physical activity, determinants, healthy aging, older people, Germany  
19  
20

21 49

22  
23  
24 50 **Strengths and limitations of this study**

- 25  
26  
27 51 • This study pairs some of the advantages of a nationwide, population-based survey with a  
28  
29 52 cohort study design  
30  
31 53 • Another strength is the long average follow-up period of 12 years  
32  
33 54 • A limitation is the assessment of the outcome indicators with self-reports on physical activity  
34  
35 55 level that are prone to recall and social desirability bias  
36  
37 56 • The study sample size of 1184 persons is appropriate to conduct analysis based on the whole  
38  
39 57 sample but limited to conduct sub-group analysis  
40  
41  
42  
43  
44  
45  
46  
47  
48  
49  
50  
51  
52  
53  
54  
55  
56  
57  
58  
59  
60

## 58 **Background**

59 In Germany, 50 % of adults aged 65 years and older suffer from at least three chronic diseases [1].  
60 Physical activity (PA) can play a major role to prevent multimorbidity in this age group because of the  
61 wide range of health conditions which can be positively influenced by PA [2]. Regular PA in older  
62 adults contributes to a variety of health benefits such as lower risks of cardiovascular diseases [3],  
63 functional limitations [4], dementia [5] and all-cause mortality [6] as well as a better psychological  
64 wellbeing [3]. Furthermore, PA plays an important role in the treatment and management of many  
65 chronic diseases and conditions such as hypertension, hyperlipidemia, type 2 diabetes and obesity  
66 [3]. Low intensity PA can improve the health status of the sedentary elderly and moderate and  
67 vigorous intensity aerobic PAs may be even more beneficial [4, 7, 8]. The World Health Organization  
68 (WHO) recommends that older adults engage in moderate intensity aerobic PA of at least 150  
69 minutes per week or vigorous intensity aerobic PA of at least 75 minutes per week [9]. However, in  
70 many countries the majority of the elderly population does not achieve the WHO recommendation  
71 [10]. In Germany, three fourths of women and three fifths of men aged 65 years and older engage in  
72 less than 150 minutes of aerobic PA per week and half of them engage in less than one day per week  
73 of aerobic PA [11]. In the context of population ageing, this observation demonstrates the potential  
74 of PA promotion to support healthy ageing, which is defined by the WHO as 'developing and  
75 maintaining the functional ability that enables well-being in older age' [2]. Therefore, to effectively  
76 promote PA and plan interventions, further knowledge is needed about factors influencing PA in  
77 older adults and groups at risk for an inactive lifestyle. Ecological models are commonly used to  
78 select and structure determinants of PA behaviour [12]. These models imply that factors from  
79 multiple levels (e.g. individual, interpersonal, environment, policy and global) influence PA. PA  
80 behaviour of older adults is structured in a similar way, with multiple levels of influencing factors:  
81 individual factors, e.g. age, sex and physical health [13, 14], interpersonal factors, e.g. living with a  
82 spouse and social support [14] and environmental factors, e.g. the built environment [13, 15].

1  
2  
3  
4  
5  
6  
7  
8  
9  
10  
11  
12  
13  
14  
15  
16  
17  
18  
19  
20  
21  
22  
23  
24  
25  
26  
27  
28  
29  
30  
31  
32  
33  
34  
35  
36  
37  
38  
39  
40  
41  
42  
43  
44  
45  
46  
47  
48  
49  
50  
51  
52  
53  
54  
55  
56  
57  
58  
59  
60

83 However, the evidence in the literature on determinants of regular PA in older adults based on  
84 cohort study data is limited [13].

85 This study aimed to investigate determinants of regular aerobic PA among older adults living in  
86 Germany using data from a nationwide, population-based cohort study.

## 87 **Methods**

### 88 **Study design and participants**

89 Data from the German National Health Interview and Examination Survey for adults 1997-99  
90 (GNHIES98) baseline survey and its first follow-up wave 2008-11 (DEGS1) were used. GNHIES98 and  
91 DEGS1 are components of the national German Federal Health Monitoring programme, operated by  
92 the Robert Koch Institute, which monitors the health status and health behaviour of adults 18 years  
93 and older in Germany. The survey study design is described in detail elsewhere [16, 17]. In summary,  
94 GNHIES98 and DEGS1 are both nationwide, population-based health examination surveys. Individuals  
95 of the general adult population were randomly selected in 130 nationally distributed sample points  
96 using a two-stage clustered sampling procedure: initially communities were sampled (primary sample  
97 unit) and within these communities address information was randomly drawn from local population  
98 registries. Institutionalized persons were excluded from the study sample. The GNHIES98 sample was  
99 comprised of 7124 participants between the ages of 18 and 79 years and the DEGS1 sample of 8152  
100 participants between the ages of 18 and 91 years [18, 19]. Interviews, examinations and tests were  
101 carried out in both surveys. GNHIES98 data collection was conducted from October 1997 to March  
102 1999 and DEGS1 data collection was conducted from November 2008 to December 2011. GNHIES98  
103 was approved by the Board of the Federal Commissioner for Data Protection Berlin. DEGS1 was  
104 approved by the Federal and State Commissioners for Data Protection and by the ethics committee  
105 of the Charité – University Medicine Berlin (No. EA2/047/08). All participants provided informed  
106 written consent.

1  
2  
3 107 The response rates were 61 % for GNHIES98 and 62 % for DEGS1 [18, 19]. All GNHIES98 participants  
4  
5 108 were invited to participate in the DEGS1 follow-up survey. To improve the re-participation rate,  
6  
7 109 participants who moved away or were not willing or able to visit the examination centre had the  
8  
9 110 opportunity to take part in an interview programme. GNHIES98 participants were enrolled in DEGS1  
10  
11 111 between 10 and 15 years after GNHIES98 participation; 91 % participated 11 to 13 years after  
12  
13 112 GNHIES98. The age range of the study sample for analysis was defined as participants aged 65 years  
14  
15 113 or older at follow-up (DEGS1). This included persons who were aged 50 years or above at baseline  
16  
17 114 (GNHIES98). A flow chart of participants is shown in Figure 1. 50.5 % (n = 1501) of GNHIES98  
18  
19 115 participants, aged 65 years or older at follow-up, participated in DEGS1. Of the 49.5 % non-  
20  
21 116 participants, 19.3 % (n = 575) had died during the follow-up period. A lower re-participation rate was  
22  
23 117 observed for men, older participants, participants with lower socioeconomic status (SES),  
24  
25 118 participants with chronic disease as well as those with lower leisure time PA level (Additional file 1).  
26  
27 119 The final study sample included 1184 participants after exclusion of participants who were younger  
28  
29 120 than 65 years at follow-up (n = 220) and participants with missing data for the PA outcome variable  
30  
31 121 (n = 97). The multivariate analysis was conducted based on a complete-case sample (n = 1143); thus  
32  
33 122 an additional 41 participants were excluded due to missing data for at least one of the covariates  
34  
35 123 used.

## 39 124 **Definition of variables**

### 40 125 *Outcome variable*

41  
42 126 The participants were asked at follow-up about the number of days and the duration on an average  
43  
44 127 day they engage in physical activities which make her or him sweat or get out of breath in an average  
45  
46 128 week. The reference period was the last three months. A dichotomous variable was constructed with  
47  
48 129 the categories: 'aerobic PA  $\geq 1$  day per week'; Yes/No. This cut-off point was chosen because regular  
49  
50 130 aerobic PA on a weekly basis is associated with substantial health benefits [3].  
51  
52  
53  
54  
55  
56  
57  
58  
59  
60



1  
2  
3 131 *Predictor variables*  
4

5 132 The information used for constructing the exposure variables was assessed in the baseline survey  
6  
7 133 (GNHIES98) with self-administered questionnaires, physician-administered computer-assisted  
8  
9 134 personal interviews (CAPI) or physical examinations. The variables were selected based on theories  
10  
11 135 and evidence available in the literature [12, 20]. According to the ecological model, individual  
12  
13 136 (demographic variables, health status), interpersonal (living with a spouse, social support), health  
14  
15 137 behavioural (LTPA, participation in a health behaviour change programme, smoking status) and  
16  
17 138 environmental (size of and satisfaction with the living area) factors were included in the analysis.  
18  
19

20  
21 139 Individual factors  
22

23  
24 140 Participant SES was assessed using an index based on the educational level, household income and  
25  
26 141 occupational status of the participants which has been described in detail elsewhere [21]. The  
27  
28 142 prevalence of chronic diseases was assessed during the CAPI. Participants were defined as 'having a  
29  
30 143 chronic disease' if they indicated diagnosis by a physician of at least one of the following diseases:  
31  
32 144 coronary heart disease, stroke, diabetes, respiratory disease or cancer. Participant body mass index  
33  
34 145 (BMI) was calculated using measured participant weight and height. According to the guidelines of  
35  
36 146 the WHO, obesity was defined as BMI  $\geq 30$  kg/m<sup>2</sup> [22].  
37  
38

39 147 Interpersonal factors  
40

41  
42 148 Participants were defined as 'living with a spouse' if they indicated marriage or co-habitation with  
43  
44 149 their spouse. The question 'How many people are so close to you that you can count on them if you  
45  
46 150 have serious personal problems?' derived from the Oslo-3 Social Support Scale [23] was used as  
47  
48 151 proxy variable for social support. Two categories were constructed: 'low social support' (1 person or  
49  
50 152 none) and 'high social support' (at least 2 persons).  
51  
52

53 153 Behavioural factors  
54  
55  
56  
57  
58  
59  
60

1  
2  
3 154 'Leisure time physical activity' (LTPA) was assessed with the question, 'On average, how often do you  
4  
5 155 do sports activities or other physical activities in your leisure time, which make you sweat or out of  
6  
7 156 breath?'. The five answer categories were summarised into 2 categories: 'weekly LTPA' (daily/3 to 6  
8  
9 157 times a week/1 to 2 times a week) and 'no weekly LTPA' (once a month/never). 'Participation in at  
10  
11 158 least one health behaviour change programme' (abbreviated as 'at least one health programme') was  
12  
13 159 defined if participants reported participation in a programme with the topic 'weight reduction',  
14  
15 160 'healthy nutrition', 'back training' or 'stress management' during the last twelve months [24]. The  
16  
17 161 variable should be an indicator for health oriented behaviour. Participants were defined as 'smoker'  
18  
19 162 if they reported that they currently smoke and were defined as 'non-smoker' if they identified as a  
20  
21 163 former smoker or as having never smoked.

#### 24 164 Environmental factors

26  
27 165 A 'residential area size' variable was constructed with four categories: 'rural area' (< 5000  
28  
29 166 inhabitants); 'small-sized city' (5000 - < 20,000 inhabitants); 'medium-sized city' (20,000 - < 100,000  
30  
31 167 inhabitants); 'metropolitan city' ( $\geq$  100,000 inhabitants). For a subjective estimation of the  
32  
33 168 environment, participants were asked to rate the 'satisfaction with their living area' on a 7-point  
34  
35 169 scale (from 1 'very unsatisfied' to 7 'very satisfied'). A dichotomous variable was constructed with the  
36  
37 170 categories 'not satisfied' (points 1-5) and 'satisfied' (points 6 and 7).

#### 40 171 **Statistical analyses**

42  
43 172 All statistical analyses were performed with the survey design procedure of Stata 14.1 to adjust for  
44  
45 173 cluster design. P-values less than 0.05 were defined as statistically significant. Determinants of  
46  
47 174 aerobic PA  $\geq$ 1 day/week were investigated in two steps: first, bivariate analyses were performed and,  
48  
49 175 second, exposure variables that were significantly associated with the outcome in the bivariate  
50  
51 176 analysis ( $p < .05$ ) were included in a stepwise logistic regression analysis. Bivariate associations  
52  
53 177 between the exposure and outcome variables were analysed with the Pearson's chi-squared test  
54  
55 178 with Rao-Scott correction. In the logistic regression, odds ratios (OR) and 95 % confidence intervals

1  
2  
3 179 (CI) were estimated to examine the associations between baseline exposure variables and  
4  
5 180 participation in aerobic PA  $\geq 1$  day/week at follow-up. During the stepwise analysis three models  
6  
7 181 were investigated: Model 1 included individual factors (sex, age, SES, chronic disease and obesity), in  
8  
9 182 Model 2 the interpersonal factors living with a spouse and social support were added, in Model 3 the  
10  
11 183 behavioural variables were added (LTPA, at least one health programme). To detect multicollinearity  
12  
13 184 between the covariates, variance inflation factors (VIF) were calculated. All VIFs were less than 1.5  
14  
15 185 and thus clearly lower than the common threshold for multicollinearity of 10 [25]. To investigate  
16  
17 186 whether the determinants of aerobic PA  $\geq 1$  day/week differ between men and women and between  
18  
19 187 different age groups, age and sex interaction analyses were performed for all associations presented  
20  
21 188 in the Model 3.

## 189 **Results**

### 190 **Participants**

191 52.5 % (n = 622) of the participants were women. The mean age of the participants at baseline was  
192 60 years (range 50-78 years) and at follow-up 72 years (range 65-91 years). 60.2 % (n = 713) were in  
193 the age group '50 -60 years' at baseline and 39.8 % (n = 471) in the age group '61-78 years'. The  
194 description of the participants according to socio-demographic, health-related, interpersonal,  
195 behavioural and environmental variables at baseline is presented in Table 1. When comparing  
196 participants from the older age group (61-78 years) to participants from the younger age group (50-  
197 60 years) at baseline, older participants had high SES less often, had a chronic disease more often,  
198 lived with a spouse less often, participated in LTPA less often, participated in a health programme less  
199 often and smoked less often than younger participants (each  $p < .05$ ).

### 200 **Aerobic PA $\geq 1$ day/week**

201 53.2 % of the participants engaged in aerobic PA  $\geq 1$  day/week at follow up. No significant difference  
202 was observed between men and women (55.3 % vs 51.3 %;  $p = .158$ ). The prevalence of engaging in

1  
2  
3 203 aerobic PA  $\geq 1$  day/week (41.2 %) was lower at baseline among the 61-78 year age group than among  
4  
5 204 the 50-60 year age group, where prevalence was 61.2 % ( $p < .001$ ). The prevalence of aerobic PA  $\geq 1$   
6  
7 205 day/week according to baseline socio-demographic, health-related, behavioural, social and  
8  
9 206 environmental variables is shown in Table 2.

### 11 207 **Determinants of engaging in aerobic PA $\geq 1$ day/week**

12  
13  
14 208 Binary analyses showed (Table 2) that age, SES, chronic disease, obesity, living with a spouse, social  
15  
16 209 support, LTPA and participation in at least one health programme at baseline were significantly  
17  
18 210 associated with aerobic PA  $\geq 1$  day/week at follow-up.

19  
20  
21 211 Multivariate analyses showed that age, SES, social support and LTPA were predictors for aerobic PA  
22  
23 212  $\geq 1$  day/week at follow-up (Table 3). The results of Model 3 (all binary significant variables included)  
24  
25 213 indicated that participants aged 50 to 60 years were more likely to engage in aerobic PA  $\geq 1$  day/week  
26  
27 214 than participants aged 61 to 78 years, with an OR of 1.88 (95% CI, 1.46-2.40). Participants with  
28  
29 215 middle or high SES were more likely to engage in aerobic PA  $\geq 1$  day/week than participants with low  
30  
31 216 SES, with an OR of 2.08 (1.33-3.25) for middle SES and 3.44 (2.11-5.60) for high SES. Participants with  
32  
33 217 high social support were more likely to engage in aerobic PA  $\geq 1$  day/week at follow up than  
34  
35 218 participants with a low social support, with an OR of 1.98 (1.26-3.12). Furthermore, participants who  
36  
37 219 participate in LTPA every week at baseline were more likely to engage in aerobic PA  $\geq 1$  day/week at  
38  
39 220 follow up than inactive participants, with an OR of 1.95 (1.46-2.60).

### 41 221 **Subgroup analyses**

42  
43  
44 222 The interaction analyses showed that age was an effect modifier for the association between SES and  
45  
46 223 aerobic PA  $\geq 1$  day/week and for the association between social support and aerobic PA  $\geq 1$  day/week  
47  
48 224 (interaction term age\*middle SES:  $p = .033$ ; age\*high SES:  $p < .001$ ; age\*social support:  $p < .001$ ).

49  
50  
51 225 Subgroup analyses showed that SES was a significant determinant of aerobic PA  $\geq 1$  day/week only in  
52  
53 226 the age group 65 to 72 years but not in the age group 73 to 91 years. Participants in this age group  
54  
55 227 with middle or high SES were more likely to engage in aerobic PA  $\geq 1$  day/week than participants with

1  
2  
3 228 low SES (middle SES: 3.02, 1.70-5.37; high SES: 6.62, 3.74-11.72). Furthermore, social support was  
4  
5 229 only a significant determinant of aerobic PA  $\geq 1$  day/week among participants 65 to 72 years.  
6  
7 230 Participants in this age group with higher social support were more likely to engage in aerobic PA  $\geq 1$   
8  
9 231 day/week, with an OR of 3.31 (1.76-6.21). Sex was not an effect modifier for any of the presented  
10  
11 232 associations.

## 14 233 **Discussion**

17 234 In this nationwide, population-based cohort study, it was observed that half of the older adults 65+  
18  
19 235 years in Germany did not engage in aerobic PA at least one day per week. The multivariate analyses  
20  
21 236 showed that the groups at high risk for having an inactive lifestyle at age 65+ years were those who,  
22  
23 237 12 years earlier, were in the older age groups, those with low socio-economic position, low social  
24  
25 238 support and low previous levels of PA. Several additional determinants of aerobic PA identified in  
26  
27 239 binary analyses were no longer associated with the outcome after multivariate adjustment.

### 30 240 **Individual factors**

33 241 Sex was not a determinant for aerobic PA  $\geq 1$  day/week in older adults in the present study. Other  
34  
35 242 studies with older adults showed mixed results with a tendency to report a higher PA level for men  
36  
37 243 [10, 13, 14]. A time trend analysis on the prevalence of physical inactivity among German adults aged  
38  
39 244 25 to 69 years over an observation period of 20 years demonstrated that gender differences  
40  
41 245 observed in the first 1990-92 survey diminished over time so that women were no longer more  
42  
43 246 inactive than men in the 2008-2011 survey [26]. The higher proportion of women than men aged 65  
44  
45 247 years and older living in Germany participating in PA courses as part of primary prevention  
46  
47 248 programmes [24] might explain the similar PA prevalence in this study.

51 249 The observed lower odds for participation in aerobic PA  $\geq 1$  day/week with higher age in the present  
52  
53 250 study are consistent with other studies [10, 13, 14, 27]. The loss of physical function as well as the  
54  
55 251 fear of injuries and falling may play a role in the reduction of the PA level with progression of age

1  
2  
3 252 [28]. A qualitative study showed that older adults still believe that PA is inappropriate for older  
4  
5 253 people and might be even harmful [28, 29]. Furthermore, a cohort effect might explain, at least  
6  
7 254 partly, the differences between age groups. Beginning in the 1970s, the number of recreational sport  
8  
9 255 offers started to increase in Germany [30], thus the younger age group in the previously mentioned  
10  
11 256 study (22-32 years old at the year 1970) might have benefited more than the older age group.

12  
13  
14 257 Consistent with the findings reported in other studies, older adults with higher SES participated more  
15  
16 258 often in aerobic PA  $\geq 1$  day/week later in life than persons with low SES [14, 27, 31]. More social and  
17  
18 259 material resources and more PA friendly neighbourhoods may partly explain the higher activity level  
19  
20 260 of older adults with a higher SES [31, 32]. Another important factor might be the difference in PA  
21  
22 261 behaviour earlier in life. Adults with higher levels of education are more physically active in leisure  
23  
24 262 time, perhaps to compensate for work-related inactivity, whereas adults with lower levels of  
25  
26 263 education may have higher PA level during their work time [33, 34]. With age and retirement it is  
27  
28 264 likely that adults who participate in leisure time PA continue these activities, whereas adults who had  
29  
30 265 only experienced work-related activity may become inactive.

31  
32  
33 266 The results of this study suggest that chronic disease developed earlier in life is not a predictor of  
34  
35 267 aerobic PA  $\geq 1$  day/week in older adults. A cross-sectional study [31] also observed no relationship  
36  
37 268 between diabetes and hypertension and PA in older adults. However, other prospective studies  
38  
39 269 showed that older adults with poor health status were less likely to be physically active [13, 14, 35].  
40  
41 270 Prescribed PA is part of the therapy of several chronic diseases like heart disease and diabetes. Thus,  
42  
43 271 chronic diseases can act as both barriers to or motivations for PA, which may blur the association  
44  
45 272 over time. It is possible that such a blurring of the association between chronic disease and PA may  
46  
47 273 have occurred in our study. Moreover, participants with chronic diseases had a lower probability of  
48  
49 274 re-participation (see Additional File 1), reducing the possibility to rigorously investigate the long-term  
50  
51 275 association between chronic diseases and aerobic PA  $\geq 1$  day/week in our study sample.  
52  
53  
54  
55  
56  
57  
58  
59  
60

1  
2  
3 276 Furthermore, obesity was not a predictor of the outcome aerobic PA  $\geq 1$  day/week. Results of  
4  
5 277 prospective studies investigating the influence of obesity on PA in elderly are inconsistent. The  
6  
7 278 authors of a review concluded that the influence of obesity on PA is weak [14], whereas the results of  
8  
9 279 the English Longitudinal Study of Aging observed that obesity is associated with a lower likelihood of  
10  
11 280 being persistently active [27]. Similar to chronic diseases, obesity may, on the one hand, result in a  
12  
13 281 lower PA level or, on the other hand, as part of a therapy may encourage an increase in activity level.  
14  
15 282 The different directions of this association make it difficult to evaluate the effect of obesity on PA.

### 18 283 **Interpersonal factors**

20  
21 284 The results of this study suggest that interpersonal factors are important determinants of engaging in  
22  
23 285 aerobic PA  $\geq 1$  day/week in older adults. Participants with higher social support were more likely to  
24  
25 286 participate in aerobic PA  $\geq 1$  day/week. Social networks could promote physical activity among older  
26  
27 287 adults by providing information, connecting older adults to resources, such as transport services, and  
28  
29 288 providing encouragement [28, 32]. The results are in line with a cross-sectional study which observed  
30  
31 289 that in elderly people social isolation is related to negative health behaviour like physical inactivity  
32  
33 290 [36, 37]. Living with a spouse was not a significant predictor in this analysis but older adults with a  
34  
35 291 partner tended to be more physical active. Further studies observed that older adults who are  
36  
37 292 married are more likely to participate in physical activities later in life [14].

### 41 293 **Behavioural factors**

42  
43  
44 294 In the current study, former weekly LTPA was a predictor of aerobic PA  $\geq 1$  day/week in older adults.  
45  
46 295 Several studies observed that PA participation earlier in life is an important determinant of physical  
47  
48 296 behaviour among older adults, in line with our observations [29, 38]. Experiences about physical  
49  
50 297 competence as well as a positive attitude towards PA could explain the tracking of PA behaviour later  
51  
52 298 in life [29].

53  
54  
55 299 Participation in at least one PA related health programme was not a significant predictor of aerobic  
56  
57 300 PA  $\geq 1$  day/week twelve years later. It could be that programmes such as back training and stress

1  
2  
3 301 management, did not prioritize the promotion of aerobic PA and thus that participation in these  
4  
5 302 programmes had no positive effect on aerobic PA  $\geq 1$  day/week. It could also be that the programmes  
6  
7 303 increased PA level in short-term but there were no long-term effects on aerobic PA level twelve years  
8  
9 304 later.

10  
11  
12 305 In this study, smoking was not associated with aerobic PA  $\geq 1$  day/week later in life, contrary to  
13  
14 306 studies demonstrating that health risk behaviour like smoking and physical inactivity often cluster  
15  
16 307 [14, 27]. Due to the high proportion of adults aged 65 years and older living in Germany who quit  
17  
18 308 smoking [39], an explanation for no association between smoking and PA later in life might be that  
19  
20 309 many participants quit smoking during the follow-up period.

### 21 22 23 310 **Environmental factors**

24  
25  
26 311 The environmental factors investigated in the current study did not predict aerobic PA  $\geq 1$  day/week  
27  
28 312 in older adults. Environmental characteristics such as urbanization and satisfaction with the living  
29  
30 313 area are probably long-term characteristics, for which the impact on individual PA behaviour may  
31  
32 314 already has appeared earlier in life. Also after adjustment for intermediate variables, like PA at  
33  
34 315 baseline, the additional contribution seems small. Furthermore, participants might have moved to  
35  
36 316 another residential area so that the former residential area has minor influence on the activity  
37  
38 317 behaviour twelve years later. Two reviews investigated the relationship between the environmental  
39  
40 318 factors within the neighbourhood and PA in older adults and came up with contradictory findings.  
41  
42 319 The authors of one review [40] concluded that the majority of studies reviewed observed no  
43  
44 320 relationship between environmental factors (objectively and subjectively measured) and PA  
45  
46 321 behaviour of older adults. The authors of the other review [15] determined that characteristics of the  
47  
48 322 built environment (objectively measured) are associated with the PA of older adults. Differences in  
49  
50 323 the assessment of environmental characteristics as well as PA could be reasons for the differing  
51  
52 324 results.

### 53 54 55 56 325 **Age interactions**



1  
2  
3 326 SES and social support were not significant predictors of aerobic PA  $\geq 1$  day/week in the older age  
4  
5 327 group but were significant predictors in the younger age group. One explanation for this could be  
6  
7 328 decline in the prevalence of aerobic PA with increasing age leading to weaker influence of the  
8  
9 329 predictors. A lower PA prevalence also leads to a lower statistical power to determine significant  
10  
11 330 associations.

### 14 331 **Strengths and limitations**

15  
16  
17 332 This study pairs some of the advantages of a nationwide, population-based survey with a high degree  
18  
19 333 of representativeness and a cohort study design which gives stronger information on causal  
20  
21 334 inference. High efforts were undertaken at all stages of conducting GNHIES89 and DEGS1 to reduce  
22  
23 335 potential sources of bias [16, 17]. This comprised measures such as internal and external quality  
24  
25 336 control during field work, anonymous data collection and record keeping, data quality assurance and  
26  
27 337 use of accurate instruments. However, self-reports on PA level are prone to recall and social  
28  
29 338 desirability bias [41]. Thus we cannot exclude the possibility that aerobic PA  $\geq 1$  day/week was over-  
30  
31 339 reported. Also, most of the independent variables were based on self-reports involving the potential  
32  
33 340 of reporting bias. Selection bias could have appeared at different stages (selection of individuals into  
34  
35 341 the study, loss to follow-up, item non response). This may have influenced the results and may  
36  
37 342 compromise the generalizability of the findings. For instance, we were not able to consider  
38  
39 343 information of participants who had died during the follow-up period. Non-response analysis  
40  
41 344 indicates that the non-responders were older, they had on average a lower level of LTPA and SES and  
42  
43 345 more often chronic diseases and obesity compared to the responders. This suggests that the  
44  
45 346 responders are a healthier and fitter group than the non-responders and that the prevalence of  
46  
47 347 aerobic PA  $\geq 1$  day/week at follow-up might be overestimated. In addition, the study results might  
48  
49 348 not apply to elderly individuals living in a nursing home who were not eligible for inclusion into the  
50  
51 349 study sample.

### 55 350 **Conclusion**

1  
2  
3 351 Despite limitations, we conclude that several influencing factors assessed at middle age predicted  
4  
5 352 regular aerobic PA participation twelve years later. These factors should be considered when  
6  
7 353 planning interventions to prevent physical inactivity in older adults. Aerobic PA has many benefits for  
8  
9 354 aging people and can improve their life in many ways. There is a great potential to increase aerobic  
10  
11 355 PA participation in older adults in Germany. Low PA levels among older adults indicate the need for  
12  
13 356 PA promotion interventions tailored for this age group. Measures promoting a physically active  
14  
15 357 lifestyle during middle age, e.g. through workplace interventions, may have positive long-term  
16  
17 358 effects on PA level at older age due to the strong tracking of PA behaviour. Target groups for PA  
18  
19 359 interventions at middle age should be people with low SES and low social support to prevent low PA  
20  
21 360 levels later in life.  
22  
23  
24  
25  
26  
27  
28  
29  
30  
31  
32  
33  
34  
35  
36  
37  
38  
39  
40  
41  
42  
43  
44  
45  
46  
47  
48  
49  
50  
51  
52  
53  
54  
55  
56  
57  
58  
59  
60

1  
2  
3 361 **Additional material**  
4

5  
6 362 Additional File 1: DEGS1 unit nonresponse analysis, differences in selected baseline characteristics  
7  
8 363 between DEGS1 non-respondents and respondents.  
9

10  
11 364 **Abbreviations**  
12

13  
14 365 BMI – body mass index; CAPI – physician-administered computer assisted personal interview; DEGS –  
15  
16 366 German Health Interview and Examination Survey for Adults 2008-11; GNHIES98 – German National  
17  
18 367 Health Interview and Examination Survey 1997-99; OR – odds ratio; PA – physical activity; SES –  
19  
20 368 socioeconomic status; WHO – World Health Organization  
21  
22

23  
24 369 **Declarations**  
25

26  
27 370 **Ethics approval and consent to participate**  
28

29  
30 371 The study GNHIES98 was approved by the Board of the Federal Commissioner Data Protection Berlin.  
31  
32 372 DEGS1 was approved by the Federal and State Commissioners for Data Protection and by the Charité  
33  
34 373 – University Medicine Berlin ethic committee (No. EA2/047/08). All participants provided informed  
35  
36 374 written consent.  
37  
38

39 375 **Consent for publication**  
40

41  
42 376 Not applicable.  
43  
44

45 377 **Competing interests**  
46

47  
48 378 The authors declare that they do have no competing interests.  
49  
50

51 379 **Availability of data and materials**  
52  
53  
54  
55  
56  
57  
58  
59  
60

1  
2  
3 380 Datasets of GNHIES98 and DEGS1 are available via Public Use File  
4  
5 381 ([http://www.rki.de/DE/Content/Gesundheitsmonitoring/Forschungsdatenzentrum/informationen\\_a](http://www.rki.de/DE/Content/Gesundheitsmonitoring/Forschungsdatenzentrum/informationen_a)  
6  
7 382 [ntrag/info\\_antrag\\_node.html](http://www.rki.de/DE/Content/Gesundheitsmonitoring/Forschungsdatenzentrum/informationen_a_ntrag/info_antrag_node.html)).  
8  
9

### 10 383 **Funding**

11  
12  
13 384 The Health Surveys GNHIES98 and DEGS1 are funded by the Federal Ministry of Health Germany.  
14  
15

### 16 385 **Authors' contributions**

17  
18  
19 386 GBMM was involved in the design and conduct of GNHIES98 and DEGS1 in particular for the physical  
20  
21 387 activity questions. SK and KM conceptualized the current study. KM conducted the present analysis  
22  
23 388 and GBMM, SJ, AS and JDF contributed to the analysis plan and interpretation of the results. KM  
24  
25 389 drafted the manuscript and GBMM, SJ, AS, SK and JDF critically revised it. JDF contributed to writing  
26  
27 390 the manuscript. All authors read and approved the final manuscript.  
28  
29

### 30 391 **Acknowledgements**

31  
32  
33 392 We thank Katherine Ombrellaro for proofreading and language editing.  
34  
35  
36  
37  
38  
39  
40  
41  
42  
43  
44  
45  
46  
47  
48  
49  
50  
51  
52  
53  
54  
55  
56  
57  
58  
59  
60

## References

1. Fuchs J, Busch M, Lange C, Scheidt-Nave C: **Prevalence and patterns of morbidity among adults in Germany. Results of the German telephone health interview survey German Health Update (GEDA) 2009.** *Bundesgesundheitsblatt Gesundheitsforschung Gesundheitsschutz* 2012, **55**(4):576-586.
2. World Health Organization: **World report on ageing and health.** Geneva, Switzerland: World Health Organization; 2015.
3. Chodzko-Zajko WJ, Proctor DN, Fiatarone Singh MA, Minson CT, Nigg CR, Salem GJ, Skinner JS: **American College of Sports Medicine position stand. Exercise and physical activity for older adults.** *Med Sci Sports Exerc* 2009, **41**(7):1510-1530.
4. Paterson DH, Warburton DE: **Physical activity and functional limitations in older adults: a systematic review related to Canada's Physical Activity Guidelines.** *Int J Behav Nutr Phys Act* 2010, **7**:38.
5. Hamer M, Chida Y: **Physical activity and risk of neurodegenerative disease: a systematic review of prospective evidence.** *Psychol Med* 2009, **39**(1):3-11.
6. Stessman J, Hammerman-Rozenberg R, Cohen A, Ein-Mor E, Jacobs JM: **Physical activity, function, and longevity among the very old.** *Arch Intern Med* 2009, **169**(16):1476-1483.
7. Mensink GB, Ziese T, Kok FJ: **Benefits of leisure-time physical activity on the cardiovascular risk profile at older age.** *Int J Epidemiol* 1999, **28**(4):659-666.
8. Hupin D, Roche F, Gremeaux V, Chatard JC, Oriol M, Gaspoz JM, Barthelemy JC, Edouard P: **Even a low-dose of moderate-to-vigorous physical activity reduces mortality by 22% in adults aged >=60 years: a systematic review and meta-analysis.** *Br J Sports Med* 2015, **49**(19):1262-1267.
9. World Health Organization: **Global recommendations on physical activity for health.** Geneva, Switzerland: World Health Organization; 2010.
10. Sun F, Norman IJ, While AE: **Physical activity in older people: a systematic review.** *BMC Public Health* 2013, **13**:449.
11. Robert Koch-Institut: **Daten und Fakten: Ergebnisse der Studie "Gesundheit in Deutschland aktuell 2012".** Berlin: Robert-Koch-Inst.; 2014.
12. Bauman AE, Reis RS, Sallis JF, Wells JC, Loos RJ, Martin BW, Lancet Physical Activity Series Working G: **Correlates of physical activity: why are some people physically active and others not?** *Lancet* 2012, **380**(9838):258-271.
13. Koeneman MA, Verheijden MW, Chinapaw MJ, Hopman-Rock M: **Determinants of physical activity and exercise in healthy older adults: a systematic review.** *Int J Behav Nutr Phys Act* 2011, **8**:142.
14. Van Stralen M, De Vries H, Mudde A, Bolman C, Lechner L: **Determinants of initiation and maintenance of physical activity among older adults: a literature review.** *Health Psychology Review* 2009, **3**(2):147-207.
15. Rosso AL, Auchincloss AH, Michael YL: **The urban built environment and mobility in older adults: a comprehensive review.** *J Aging Res* 2011, **2011**:816106.
16. Bellach BM, Knopf H, Thefeld W: **The German Health Survey. 1997/98.** *Gesundheitswesen* 1998, **60 Suppl 2**:S59-68.
17. Scheidt-Nave C, Kamtsiuris P, Gosswald A, Holling H, Lange M, Busch MA, Dahm S, Dolle R, Ellert U, Fuchs J *et al*: **German health interview and examination survey for adults (DEGS) - design, objectives and implementation of the first data collection wave.** *BMC Public Health* 2012, **12**:730.
18. Kamtsiuris P, Lange M, Hoffmann R, Schaffrath Rosario A, Dahm S, Kuhnert R, Kurth BM: **The first wave of the German Health Interview and Examination Survey for Adults (DEGS1): sample design, response, weighting and representativeness.** *Bundesgesundheitsblatt Gesundheitsforschung Gesundheitsschutz* 2013, **56**(5-6):620-630.

- 1  
2  
3 444 19. Thefeld W, Stolzenberg H, Bellach BM: **The Federal Health Survey: response, composition of**  
4 445 **participants and non-responder analysis.** *Gesundheitswesen* 1999, **61 Spec No:**S57-61.  
5 446 20. Koeneman MA, Chinapaw MJ, Verheijden MW, van Tilburg TG, Visser M, Deeg DJ, Hopman-  
6 447 **Rock M: Do major life events influence physical activity among older adults: the**  
7 448 **Longitudinal Aging Study Amsterdam.** *Int J Behav Nutr Phys Act* 2012, **9:**147.  
8 449 21. Lampert T, Kroll L, Müters S, Stolzenberg H: **[Measurement of socioeconomic status in the**  
9 450 **German health interview and examination survey for adults (DEGS1)].**  
10 451 *Bundesgesundheitsblatt - Gesundheitsforschung - Gesundheitsschutz* 2013, **56(5):**631-636.  
11 452 22. **BMI classification** [[http://apps.who.int/bmi/index.jsp?introPage=intro\\_3.html](http://apps.who.int/bmi/index.jsp?introPage=intro_3.html)]  
12 453 23. Dalgard OS, Dowrick C, Lehtinen V, Vazquez-Barquero JL, Casey P, Wilkinson G, Ayuso-  
13 454 **Mateos JL, Page H, Dunn G, Group O: Negative life events, social support and gender**  
14 455 **difference in depression: a multinational community survey with data from the ODIN**  
15 456 **study.** *Soc Psychiatry Psychiatr Epidemiol* 2006, **41(6):**444-451.  
16 457 24. Jordan S, von der Lippe E: **Participation in health behaviour change programmes: results of**  
17 458 **the German Health Interview and Examination Survey for Adults (DEGS1).**  
18 459 *Bundesgesundheitsblatt Gesundheitsforschung Gesundheitsschutz* 2013, **56(5-6):**878-884.  
19 460 25. Hair JF: **Multivariate data analysis with readings.** Englewood Cliffs, N.J.: Prentice Hall; 1995.  
20 461 26. Finger JD, Busch MA, Du Y, Heidemann C, Knopf H, Kuhnert R, Lampert T, Mensink GBM,  
21 462 **Neuhauser HK, Rosario AS et al: Time trends in cardiometabolic risk factors in adults -**  
22 463 **Results from three nationwide German examination surveys from 1990–2011.** *Deutsches*  
23 464 *Arzteblatt International* 2016, **113(42):**712-719.  
24 465 27. Smith L, Gardner B, Fisher A, Hamer M: **Patterns and correlates of physical activity**  
25 466 **behaviour over 10 years in older adults: prospective analyses from the English Longitudinal**  
26 467 **Study of Ageing.** *BMJ Open* 2015, **5(4):**e007423.  
27 468 28. Franco MR, Tong A, Howard K, Sherrington C, Ferreira PH, Pinto RZ, Ferreira ML: **Older**  
28 469 **people's perspectives on participation in physical activity: a systematic review and**  
29 470 **thematic synthesis of qualitative literature.** *Br J Sports Med* 2015, **49(19):**1268-1276.  
30 471 29. Hirvensalo M, Lintunen T: **Life-course perspective for physical activity and LTPA.** *European*  
31 472 *Review of Aging and Physical Activity* 2011, **8(1):**13-22.  
32 473 30. DaCosta L, Maragaya A: **Worldwide experiences and trends in sport for all.** Oxford: Meyer &  
33 474 Meyer; 2002.  
34 475 31. Mesters I, Wahl S, Van Keulen HM: **Socio-demographic, medical and social-cognitive**  
35 476 **correlates of physical activity behavior among older adults (45-70 years): a cross-sectional**  
36 477 **study.** *BMC Public Health* 2014, **14:**647.  
37 478 32. McNeill LH, Kreuter MW, Subramanian SV: **Social environment and physical activity: a**  
38 479 **review of concepts and evidence.** *Soc Sci Med* 2006, **63(4):**1011-1022.  
39 480 33. Finger JD, Tylleskar T, Lampert T, Mensink GB: **Physical activity patterns and socioeconomic**  
40 481 **position: the German National Health Interview and Examination Survey 1998 (GNHIES98).**  
41 482 *BMC Public Health* 2012, **12:**1079.  
42 483 34. Hoebel J, Finger JD, Kuntz B, Kroll LE, Manz K, Lange C, Lampert T: **Changing educational**  
43 484 **inequalities in sporting inactivity among adults in Germany: a trend study from 2003 to**  
44 485 **2012.** *BMC Public Health* 2017, **17(1):**547.  
45 486 35. Hakola L, Hassinen M, Komulainen P, Lakka TA, Savonen K, Rauramaa R: **Correlates of low**  
46 487 **physical activity levels in aging men and women: the DR's EXTRA Study (ISRCTN45977199).**  
47 488 *J Aging Phys Act* 2015, **23(2):**247-255.  
48 489 36. Nicholson NR: **A review of social isolation: an important but underassessed condition in**  
49 490 **older adults.** *J Prim Prev* 2012, **33(2-3):**137-152.  
50 491 37. Christiansen J, Larsen FB, Lasgaard M: **Do stress, health behavior, and sleep mediate the**  
51 492 **association between loneliness and adverse health conditions among older people?** *Soc Sci*  
52 493 *Med* 2016, **152:**80-86.  
53  
54  
55  
56  
57  
58  
59  
60

- 1  
2  
3 494 38. Hamer M, Kivimaki M, Steptoe A: **Longitudinal patterns in physical activity and sedentary**  
4 495 **behaviour from mid-life to early old age: a substudy of the Whitehall II cohort.** *J Epidemiol*  
5 496 *Community Health* 2012, **66**(12):1110-1115.  
6 497 39. Lampert T, von der Lippe E, Müters S: **Prevalence of smoking in the adult population of**  
7 498 **Germany: results of the German Health Interview and Examination Survey for Adults**  
8 499 **(DEGS1).** *Bundesgesundheitsblatt Gesundheitsforschung Gesundheitschutz* 2013, **56**(5-  
9 500 6):802-808.  
10 501 40. Van Cauwenberg J, De Bourdeaudhuij I, De Meester F, Van Dyck D, Salmon J, Clarys P,  
11 502 Deforche B: **Relationship between the physical environment and physical activity in older**  
12 503 **adults: a systematic review.** *Health Place* 2011, **17**(2):458-469.  
13 504 41. Ekelund U, Tomkinson G, Armstrong N: **What proportion of youth are physically active?**  
14 505 **Measurement issues, levels and recent time trends.** *Br J Sports Med* 2011, **45**(11):859-865.  
15  
16  
17  
18  
19  
20  
21  
22  
23  
24  
25  
26  
27  
28  
29  
30  
31  
32  
33  
34  
35  
36  
37  
38  
39  
40  
41  
42  
43  
44  
45  
46  
47  
48  
49  
50  
51  
52  
53  
54  
55  
56  
57  
58  
59  
60

For peer review only

1  
2  
3 506 **Figures**

4  
5 507 Figure 1: Flow diagram of participants

6  
7 508

8  
9  
10  
11  
12  
13  
14  
15  
16  
17  
18  
19  
20  
21  
22  
23  
24  
25  
26  
27  
28  
29  
30  
31  
32  
33  
34  
35  
36  
37  
38  
39  
40  
41  
42  
43  
44  
45  
46  
47  
48  
49  
50  
51  
52  
53  
54  
55  
56  
57  
58  
59  
60

For peer review only



## 509 Tables

**Table 1: Baseline characteristics of the study sample (n = 1184)**

|                                | Missing | Age at baseline |             |      |             | Total | p-value     |         |
|--------------------------------|---------|-----------------|-------------|------|-------------|-------|-------------|---------|
|                                |         | %               | 95% CI      | %    | 95% CI      |       |             |         |
| <b>1 Individual factors</b>    |         |                 |             |      |             |       |             |         |
| Sex                            | 0       |                 |             |      |             |       |             |         |
| Women (n=622)                  |         | 53.0            | (49.5-56.5) | 51.8 | (48.2-55.3) | 52.5  | (49.8-55.3) | 0.600   |
| Men (n=562)                    |         | 47.0            | (43.5-50.5) | 48.2 | (44.7-51.8) | 47.5  | (44.7-50.2) |         |
| Socioeconomic status           | 14      |                 |             |      |             |       |             |         |
| Low (n=151)                    |         | 11.4            | (8.9-14.4)  | 15.2 | (11.9-19.2) | 12.9  | (10.6-15.7) | < 0.001 |
| Middle (n=712)                 |         | 57.5            | (53.5-61.3) | 66.0 | (61.6-70.1) | 60.9  | (57.8-63.8) |         |
| High (n=307)                   |         | 31.2            | (27.3-35.3) | 18.8 | (15.0-23.3) | 26.2  | (23.0-29.7) |         |
| Chronic disease                | 3       |                 |             |      |             |       |             |         |
| No (n=869)                     |         | 78.5            | (75.4-81.4) | 66.0 | (61.6-70.2) | 73.6  | (70.8-76.2) | < 0.001 |
| Yes (n=312)                    |         | 21.5            | (18.6-24.6) | 34.0 | (29.8-38.4) | 26.4  | (23.8-29.2) |         |
| Obesity                        | 3       |                 |             |      |             |       |             |         |
| Yes (n=297)                    |         | 24.5            | (20.8-28.5) | 26.2 | (22.3-30.4) | 25.1  | (22.2-28.4) | 0.504   |
| No (n=884)                     |         | 75.5            | (71.5-79.2) | 73.8 | (69.6-77.7) | 74.9  | (71.6-77.8) |         |
| <b>2 Interpersonal factors</b> |         |                 |             |      |             |       |             |         |
| Living with a spouse           | 16      |                 |             |      |             |       |             |         |
| No (n=216)                     |         | 16.7            | (14.0-19.7) | 21.2 | (17.7-25.3) | 18.5  | (16.2-21.1) | 0.035   |
| Yes (n=952)                    |         | 83.3            | (80.3-86.0) | 78.8 | (74.7-82.3) | 81.5  | (78.9-83.8) |         |
| Social support                 | 21      |                 |             |      |             |       |             |         |
| Low (n=100)                    |         | 7.6             | (5.7-10.0)  | 10.2 | (7.8-13.1)  | 8.6   | (7.0-10.5)  | 0.110   |
| High (n=1,063)                 |         | 92.4            | (90.0-94.3) | 89.8 | (86.9-92.2) | 91.4  | (89.5-93.0) |         |
| <b>3 Behavioural factors</b>   |         |                 |             |      |             |       |             |         |
| Leisure time physical activity | 26      |                 |             |      |             |       |             |         |
| Every week (n=784)             |         | 72.1            | (67.9-76.0) | 61.0 | (56.8-65.1) | 67.7  | (64.4-70.9) | < 0.001 |
| Not every week (n=374)         |         | 27.9            | (24.0-32.1) | 39.0 | (34.9-43.2) | 32.3  | (29.1-35.6) |         |
| At least one health programme  | 0       |                 |             |      |             |       |             |         |
| Yes (n=124)                    |         | 12.6            | (10.4-15.3) | 7.2  | (5.2-10.0)  | 10.5  | (8.8-12.5)  | 0.002   |
| No (n=1,060)                   |         | 87.4            | (84.7-89.6) | 92.8 | (90.0-94.8) | 89.5  | (87.5-91.2) |         |
| Smoking status                 | 11      |                 |             |      |             |       |             |         |
| Smoker (n=188)                 |         | 20.0            | (17.2-23.0) | 10.1 | (7.5-13.3)  | 16.0  | (14.0-18.2) | < 0.001 |
| Non-smoker (n=985)             |         | 80.0            | (77.0-82.8) | 89.9 | (86.7-92.5) | 84.0  | (81.8-86.0) |         |
| <b>4 Environmental factors</b> |         |                 |             |      |             |       |             |         |
| Residential area size          | 0       |                 |             |      |             |       |             |         |
| Rural (n=249)                  |         | 20.3            | (13.5-29.4) | 22.1 | (14.4-32.2) | 21    | (14.2-30.0) | 0.601   |
| Small-sized city (n=247)       |         | 20.1            | (13.3-29.1) | 22.1 | (14.4-32.3) | 20.9  | (14.0-30.0) |         |
| Medium-sized city (n=318)      |         | 26.9            | (19.0-36.7) | 26.8 | (18.5-37.0) | 26.9  | (19.1-36.3) |         |
| Metropolitan city (n=370)      |         | 32.7            | (23.7-43.1) | 29.1 | (20.4-39.7) | 31.3  | (22.7-41.4) |         |

|                                    |      |             |      |             |      |             |       |  |
|------------------------------------|------|-------------|------|-------------|------|-------------|-------|--|
| Satisfaction with residential area | 21   |             |      |             |      |             |       |  |
| Not satisfied (n=308)              | 26.1 | (22.9-29.7) | 27.0 | (23.3-31.0) | 26.5 | (23.9-29.2) | 0.733 |  |
| Satisfied (n=855)                  | 73.9 | (70.3-77.1) | 73.0 | (69.0-76.7) | 73.5 | (70.8-76.1) |       |  |

---

510

511

For peer review only

**Table 2: Bivariate associations between aerobic physical activity  $\geq$  1 day/week and potential predictor variables**

|   |                                | Aerobic physical activity $\geq$ 1 day/week |             |      |             | p-value* |
|---|--------------------------------|---------------------------------------------|-------------|------|-------------|----------|
|   |                                | No                                          |             | Yes  |             |          |
|   |                                | %                                           | 95% CI      | %    | 95% CI      |          |
| 1 | Sex                            |                                             |             |      |             |          |
|   | Women (n=622)                  | 48.7                                        | (44.7-52.7) | 51.3 | (47.3-55.3) | 0.158    |
|   | Men (n=562)                    | 44.7                                        | (40.1-49.4) | 55.3 | (50.6-59.9) |          |
|   | Age group                      |                                             |             |      |             |          |
|   | 50-60 years (n=713)            | 38.8                                        | (35.1-42.8) | 61.2 | (57.2-64.9) | < 0.001  |
|   | 61-78 years (n=471)            | 58.8                                        | (54.1-63.4) | 41.2 | (36.6-45.9) |          |
|   | Socioeconomic status           |                                             |             |      |             |          |
|   | Low (n=151)                    | 70.2                                        | (62.0-77.3) | 29.8 | (22.7-38.0) | < 0.001  |
|   | Middle (n=712)                 | 47.9                                        | (43.8-52.0) | 52.1 | (48.0-56.2) |          |
|   | High (n=307)                   | 31.9                                        | (27.0-37.3) | 68.1 | (62.7-73.0) |          |
|   | Chronic disease                |                                             |             |      |             |          |
|   | No (n=869)                     | 44.1                                        | (40.5-47.7) | 55.9 | (52.3-59.5) | 0.006    |
|   | Yes (n=312)                    | 53.8                                        | (47.6-60.0) | 46.2 | (40.0-52.4) |          |
|   | Obesity                        |                                             |             |      |             |          |
|   | Yes (n=297)                    | 53.5                                        | (47.4-59.5) | 46.5 | (40.5-52.6) | 0.005    |
|   | No (n=884)                     | 44.6                                        | (41.2-48.0) | 55.4 | (52.0-58.8) |          |
| 2 | Living with a spouse           |                                             |             |      |             |          |
|   | No (n=216)                     | 57.4                                        | (51.1-63.4) | 42.6 | (36.6-48.9) | < 0.001  |
|   | Yes (n=952)                    | 44.1                                        | (40.5-47.8) | 55.9 | (52.2-59.5) |          |
|   | Social support                 |                                             |             |      |             |          |
|   | Low (n=100)                    | 65.0                                        | (55.4-73.5) | 35.0 | (26.5-44.6) | < 0.001  |
|   | High (n=1,063)                 | 44.9                                        | (41.6-48.2) | 55.1 | (51.8-58.4) |          |
| 3 | Leisure time physical activity |                                             |             |      |             |          |
|   | Every week (n=784)             | 38.6                                        | (34.8-42.6) | 61.4 | (57.4-65.2) | < 0.001  |
|   | Not every week (n=374)         | 62.8                                        | (57.6-67.8) | 37.2 | (32.2-42.4) |          |
|   | At least one health programme  |                                             |             |      |             |          |
|   | Yes (n=124)                    | 34.7                                        | (26.7-43.6) | 65.3 | (56.4-73.3) | 0.005    |
|   | No (n=1,060)                   | 48.2                                        | (44.8-51.7) | 51.8 | (48.3-55.2) |          |
|   | Smoking status                 |                                             |             |      |             |          |
|   | Smoker (n=188)                 | 49.5                                        | (41.7-57.3) | 50.5 | (42.7-58.3) | 0.406    |
|   | Non-smoker (n=985)             | 46.0                                        | (42.5-49.5) | 54.0 | (50.5-57.5) |          |
| 4 | Residential area size          |                                             |             |      |             |          |
|   | Rural (n=249)                  | 48.6                                        | (42.1-55.1) | 51.4 | (44.9-57.9) | 0.873    |
|   | Small-sized city (n=247)       | 48.2                                        | (39.4-57.1) | 51.8 | (42.9-60.6) |          |
|   | Medium-sized city (n=318)      | 45.9                                        | (39.6-52.4) | 54.1 | (47.6-60.4) |          |

|                                    |      |             |      |             |       |
|------------------------------------|------|-------------|------|-------------|-------|
| Metropolitan city (n=370)          | 45.4 | (40.5-50.4) | 54.6 | (49.6-59.5) |       |
| Satisfaction with residential area |      |             |      |             | 0.711 |
| Not satisfied (n=308)              | 47.1 | (42.0-52.2) | 52.9 | (47.8-58.0) |       |
| Satisfied (n=855)                  | 46.0 | (42.2-49.7) | 54.0 | (50.3-57.8) |       |

\*Pearson's chi-squared test with Rao-Scott correction

1: Individual factors; 2: Interpersonal factors; 3: Behavioural factors; 4: Environmental factors

512

513

For peer review only

**Table 3: Stepwise adjusted odds ratios of aerobic physical activity at follow-up by baseline predictor variables, adults aged 65 years or older**

| Baseline variables             | Aerobic physical activity $\geq 1$ day/week |                      |             |                      |             |                      |
|--------------------------------|---------------------------------------------|----------------------|-------------|----------------------|-------------|----------------------|
|                                | Model 1                                     |                      | Model 2     |                      | Model 3     |                      |
|                                | OR                                          | 95 % CI              | OR          | 95 % CI              | OR          | 95 % CI              |
| Sex                            |                                             |                      |             |                      |             |                      |
| Women                          | 0.95                                        | (0.73 - 1.23)        | 1.01        | (0.78 - 1.32)        | 1.05        | (0.80 - 1.38)        |
| Men                            | 1.00                                        | -                    | 1.00        | -                    | 1.00        | -                    |
| Age group                      |                                             |                      |             |                      |             |                      |
| 50-60 years                    | <b>2.00</b>                                 | <b>(1.56 - 2.56)</b> | <b>1.97</b> | <b>(1.53 - 2.52)</b> | <b>1.88</b> | <b>(1.46 - 2.40)</b> |
| 61-78 years                    | 1.00                                        | -                    | 1.00        | -                    | 1.00        | -                    |
| Socioeconomic status           |                                             |                      |             |                      |             |                      |
| Low                            | 1.00                                        | -                    | 1.00        | -                    | 1.00        | -                    |
| Middle                         | <b>2.48</b>                                 | <b>(1.61 - 3.84)</b> | <b>2.39</b> | <b>(1.54 - 3.70)</b> | <b>2.08</b> | <b>(1.33 - 3.25)</b> |
| High                           | <b>4.52</b>                                 | <b>(2.83 - 7.23)</b> | <b>4.29</b> | <b>(2.67 - 6.90)</b> | <b>3.44</b> | <b>(2.11 - 5.60)</b> |
| Chronic disease                |                                             |                      |             |                      |             |                      |
| No                             | 1.25                                        | (0.92 - 1.69)        | 1.24        | (0.91 - 1.69)        | 1.21        | (0.89 - 1.66)        |
| Yes                            | 1.00                                        | -                    | 1.00        | -                    | 1.00        | -                    |
| Obesity                        |                                             |                      |             |                      |             |                      |
| No                             | 1.23                                        | (0.93 - 1.62)        | 1.24        | (0.94 - 1.63)        | 1.14        | (0.86 - 1.52)        |
| Yes                            | 1.00                                        | -                    | 1.00        | -                    | 1.00        | -                    |
| Living with a spouse           |                                             |                      |             |                      |             |                      |
| Yes                            |                                             |                      | 1.36        | (1.00 - 1.84)        | 1.31        | (0.96 - 1.79)        |
| No                             |                                             |                      | 1.00        | -                    | 1.00        | -                    |
| Social support                 |                                             |                      |             |                      |             |                      |
| High                           |                                             |                      | <b>2.11</b> | <b>(1.35 - 3.30)</b> | <b>1.98</b> | <b>(1.26 - 3.12)</b> |
| Low                            |                                             |                      | 1.00        | -                    | 1.00        | -                    |
| Leisure time physical activity |                                             |                      |             |                      |             |                      |
| Every week                     |                                             |                      |             |                      | <b>1.95</b> | <b>(1.46 - 2.60)</b> |
| Not every week                 |                                             |                      |             |                      | 1.00        | -                    |
| At least one health programme  |                                             |                      |             |                      |             |                      |
| Yes                            |                                             |                      |             |                      | 1.36        | (0.88 - 2.10)        |
| No                             |                                             |                      |             |                      | 1.00        | -                    |

Bold:  $p < 0.05$ ; OR = Odds Ratio; Model 1: Individual factors; Model 2: + interpersonal factors; Model 3: + behavioural factors

514

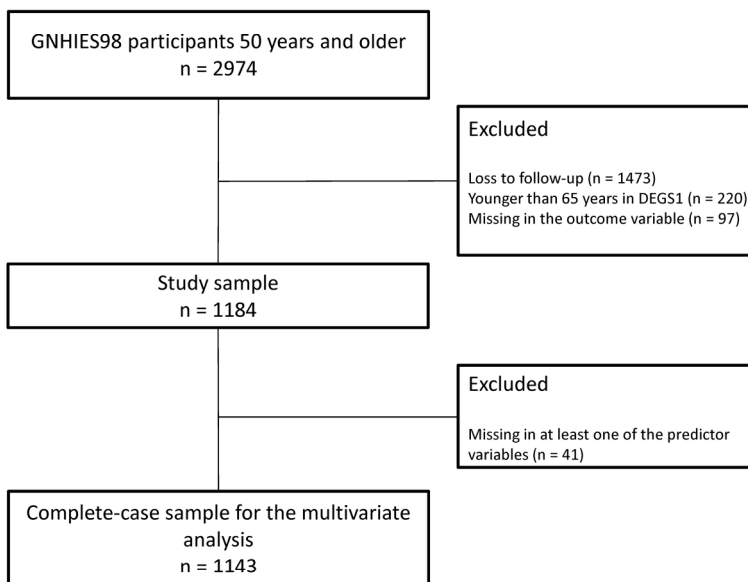

Figure 1: Flow diagram of participants

190x142mm (300 x 300 DPI)

## Additional File 1 – DEGS1 unit non-response analysis

**Table 1: Differences in selected baseline characteristics between DEGS1 respondents, non-respondents and deceased**

|                                | Responder |             | Non-responder |             | Deceased |             |
|--------------------------------|-----------|-------------|---------------|-------------|----------|-------------|
|                                | %         | 95% CI      | %             | 95% CI      | %        | 95% CI      |
| Total (n=2974)                 | 50.5      | (48.3-52.6) | 30.2          | (28.3-32.1) | 19.3     | (17.9-20.9) |
| Sex                            |           |             |               |             |          |             |
| Women (n=1,567)                | 52.6      | (50.2-55.0) | 59.2          | (56.0-62.5) | 42.6     | (39.0-46.3) |
| Men (n=1,407)                  | 47.4      | (45.0-49.8) | 40.8          | (37.5-44.0) | 57.4     | (53.7-61.0) |
| Age                            |           |             |               |             |          |             |
| 50-60 years (n=1,492)          | 65.2      | (62.6-67.7) | 43.2          | (39.9-46.5) | 21.7     | (18.5-25.3) |
| 61-78 years (n=1,482)          | 34.8      | (32.3-37.4) | 56.8          | (53.5-60.1) | 78.3     | (74.7-81.5) |
| Socioeconomic status           |           |             |               |             |          |             |
| Low (n=566)                    | 13.1      | (10.9-15.6) | 26.6          | (23.0-30.6) | 26.5     | (22.6-30.7) |
| Middle (n=1,709)               | 60.3      | (57.5-63.0) | 59.4          | (55.7-63.0) | 55.9     | (51.9-59.8) |
| High (n=611)                   | 26.6      | (23.6-30.0) | 14.0          | (11.3-17.0) | 17.6     | (14.2-21.6) |
| Chronic disease                |           |             |               |             |          |             |
| No (n=1,984)                   | 74.7      | (72.5-76.9) | 67.0          | (64.1-69.8) | 46.4     | (42.1-50.8) |
| Yes (n=980)                    | 25.3      | (23.1-27.5) | 33.0          | (30.2-35.9) | 53.6     | (49.2-57.9) |
| Obesity                        |           |             |               |             |          |             |
| Yes (n=860)                    | 26.1      | (23.3-29.1) | 34.0          | (30.6-37.6) | 29.8     | (25.8-34.1) |
| No (n=2,087)                   | 73.9      | (70.9-76.7) | 66.0          | (62.4-69.4) | 70.2     | (65.9-74.2) |
| Living with a spouse           |           |             |               |             |          |             |
| Yes (n=2,273)                  | 85.1      | (83.1-86.8) | 74.0          | (70.5-77.2) | 72.3     | (68.1-76.2) |
| No (n=589)                     | 14.9      | (13.2-16.9) | 26.0          | (22.8-29.5) | 27.7     | (23.8-31.9) |
| Leisure time physical activity |           |             |               |             |          |             |
| Every week (n=1,624)           | 67.6      | (64.7-70.4) | 46.5          | (42.5-50.5) | 43.8     | (39.1-48.6) |
| Not every week (n=1,231)       | 32.4      | (29.6-35.3) | 53.5          | (49.5-57.5) | 56.2     | (51.4-60.9) |

STROBE Statement—Checklist of items that should be included in reports of *cohort studies*

|                           | Item No | Recommendation                                                                                                                                                                       | Reported on page                    |
|---------------------------|---------|--------------------------------------------------------------------------------------------------------------------------------------------------------------------------------------|-------------------------------------|
| <b>Title and abstract</b> | 1       | (a) Indicate the study's design with a commonly used term in the title or the abstract                                                                                               | 1, 2                                |
|                           |         | (b) Provide in the abstract an informative and balanced summary of what was done and what was found                                                                                  | 2-3                                 |
| <b>Introduction</b>       |         |                                                                                                                                                                                      |                                     |
| Background/rationale      | 2       | Explain the scientific background and rationale for the investigation being reported                                                                                                 | 4                                   |
| Objectives                | 3       | State specific objectives, including any prespecified hypotheses                                                                                                                     | 5                                   |
| <b>Methods</b>            |         |                                                                                                                                                                                      |                                     |
| Study design              | 4       | Present key elements of study design early in the paper                                                                                                                              | 5                                   |
| Setting                   | 5       | Describe the setting, locations, and relevant dates, including periods of recruitment, exposure, follow-up, and data collection                                                      | 5-6                                 |
| Participants              | 6       | (a) Give the eligibility criteria, and the sources and methods of selection of participants. Describe methods of follow-up                                                           | 5-6                                 |
|                           |         | (b) For matched studies, give matching criteria and number of exposed and unexposed                                                                                                  | n/a                                 |
| Variables                 | 7       | Clearly define all outcomes, exposures, predictors, potential confounders, and effect modifiers. Give diagnostic criteria, if applicable                                             | 6-8                                 |
| Data sources/ measurement | 8*      | For each variable of interest, give sources of data and details of methods of assessment (measurement). Describe comparability of assessment methods if there is more than one group | 6-8                                 |
| Bias                      | 9       | Describe any efforts to address potential sources of bias                                                                                                                            | 15                                  |
| Study size                | 10      | Explain how the study size was arrived at                                                                                                                                            | 5 (see cited study protocol papers) |
| Quantitative variables    | 11      | Explain how quantitative variables were handled in the analyses. If applicable, describe which groupings were chosen and why                                                         | 6-9                                 |
| Statistical methods       | 12      | (a) Describe all statistical methods, including those used to control for confounding                                                                                                | 9                                   |
|                           |         | (b) Describe any methods used to examine subgroups and interactions                                                                                                                  | 9                                   |
|                           |         | (c) Explain how missing data were addressed                                                                                                                                          | 6                                   |
|                           |         | (d) If applicable, explain how loss to follow-up was addressed                                                                                                                       | Additional file 1                   |
|                           |         | (e) Describe any sensitivity analyses                                                                                                                                                | 15, Additional file 1               |
| <b>Results</b>            |         |                                                                                                                                                                                      |                                     |
| Participants              | 13*     | (a) Report numbers of individuals at each stage of study—eg numbers potentially eligible, examined for                                                                               | 6, Fig. 1                           |



|                          |     |                                                                                                                                                                                                              |                   |
|--------------------------|-----|--------------------------------------------------------------------------------------------------------------------------------------------------------------------------------------------------------------|-------------------|
|                          |     | eligibility, confirmed eligible, included in the study, completing follow-up, and analysed                                                                                                                   |                   |
|                          |     | (b) Give reasons for non-participation at each stage                                                                                                                                                         | Additional file 1 |
|                          |     | (c) Consider use of a flow diagram                                                                                                                                                                           | Fig. 1            |
| Descriptive data         | 14* | (a) Give characteristics of study participants (eg demographic, clinical, social) and information on exposures and potential confounders                                                                     | 9, Tab. 1         |
|                          |     | (b) Indicate number of participants with missing data for each variable of interest                                                                                                                          | Tab. 1            |
|                          |     | (c) Summarise follow-up time (eg, average and total amount)                                                                                                                                                  | 6                 |
| Outcome data             | 15* | Report numbers of outcome events or summary measures over time                                                                                                                                               | 9-10              |
| Main results             | 16  | (a) Give unadjusted estimates and, if applicable, confounder-adjusted estimates and their precision (eg, 95% confidence interval). Make clear which confounders were adjusted for and why they were included | 10, Tab. 2, 3     |
|                          |     | (b) Report category boundaries when continuous variables were categorized                                                                                                                                    | 6-8               |
|                          |     | (c) If relevant, consider translating estimates of relative risk into absolute risk for a meaningful time period                                                                                             | n/a               |
| Other analyses           | 17  | Report other analyses done—eg analyses of subgroups and interactions, and sensitivity analyses                                                                                                               | 10-11             |
| <b>Discussion</b>        |     |                                                                                                                                                                                                              |                   |
| Key results              | 18  | Summarise key results with reference to study objectives                                                                                                                                                     | 11                |
| Limitations              | 19  | Discuss limitations of the study, taking into account sources of potential bias or imprecision. Discuss both direction and magnitude of any potential bias                                                   | 15                |
| Interpretation           | 20  | Give a cautious overall interpretation of results considering objectives, limitations, multiplicity of analyses, results from similar studies, and other relevant evidence                                   | 15-16             |
| Generalisability         | 21  | Discuss the generalisability (external validity) of the study results                                                                                                                                        | 15                |
| <b>Other information</b> |     |                                                                                                                                                                                                              |                   |
| Funding                  | 22  | Give the source of funding and the role of the funders for the present study and, if applicable, for the original study on which the present article is based                                                | 18                |

\*Give information separately for exposed and unexposed groups.

**Note:** An Explanation and Elaboration article discusses each checklist item and gives methodological background and published examples of transparent reporting. The STROBE checklist is best used in conjunction with this article (freely available on the Web sites of PLoS Medicine at <http://www.plosmedicine.org/>, Annals of Internal Medicine at <http://www.annals.org/>, and Epidemiology at <http://www.epidem.com/>). Information on the STROBE Initiative is available at <http://www.strobe-statement.org>.

# BMJ Open

## Predictors of physical activity among older adults in Germany – a nationwide cohort study

|                                 |                                                                                                                                                                                                                                                                                                                                                                                                                                                                                                                                                         |
|---------------------------------|---------------------------------------------------------------------------------------------------------------------------------------------------------------------------------------------------------------------------------------------------------------------------------------------------------------------------------------------------------------------------------------------------------------------------------------------------------------------------------------------------------------------------------------------------------|
| Journal:                        | <i>BMJ Open</i>                                                                                                                                                                                                                                                                                                                                                                                                                                                                                                                                         |
| Manuscript ID                   | bmjopen-2018-021940.R1                                                                                                                                                                                                                                                                                                                                                                                                                                                                                                                                  |
| Article Type:                   | Research                                                                                                                                                                                                                                                                                                                                                                                                                                                                                                                                                |
| Date Submitted by the Author:   | 22-Mar-2018                                                                                                                                                                                                                                                                                                                                                                                                                                                                                                                                             |
| Complete List of Authors:       | Manz, Kristin; Robert Koch Institute, Department of Epidemiology and Health Monitoring<br>Mensink, Gert; Robert Koch Institute, Department of Epidemiology and Health Monitoring<br>Jordan, S; Robert Koch Institute, Department of Epidemiology and Health Monitoring<br>Schienkiewitz, Anja; Robert Koch Institute, Department of Epidemiology and Health Monitoring<br>Krug, S; Robert Koch Institute, Department of Epidemiology and Health Monitoring<br>Finger, Jonas D.; Robert Koch Institute, Department of Epidemiology and Health Monitoring |
| <b>Primary Subject Heading</b>: | Sports and exercise medicine                                                                                                                                                                                                                                                                                                                                                                                                                                                                                                                            |
| Secondary Subject Heading:      | Public health, Sports and exercise medicine, Epidemiology                                                                                                                                                                                                                                                                                                                                                                                                                                                                                               |
| Keywords:                       | Physical activity, Determinants, Healthy aging, Older people, Germany                                                                                                                                                                                                                                                                                                                                                                                                                                                                                   |
|                                 |                                                                                                                                                                                                                                                                                                                                                                                                                                                                                                                                                         |

SCHOLARONE™  
Manuscripts

1  
2  
3 **1 Predictors of physical activity among older adults in Germany – a nationwide cohort study**

4  
5 2

6  
7 3 Kristin Manz<sup>1</sup>, Gert B. M. Mensink<sup>1</sup>, Susanne Jordan<sup>1</sup>, Anja Schienkiewitz<sup>1</sup>, Susanne Krug<sup>1</sup>, Jonas D.  
8 4 Finger<sup>1\*</sup>

9 5

10 6

11 7 <sup>1</sup>Robert Koch Institute, Department of Epidemiology and Health Monitoring, Berlin, Germany

12 8

13  
14 9 \*Corresponding author:

15 10 Jonas D. Finger, PhD

16 11 Email: FingerJ@rki.de

17  
18 12 Address: Robert Koch-Institute, Department of Epidemiology and Health Monitoring, PO Box 650261,  
19 13 13302 Berlin, Germany

1  
2  
3 14 **Abstract**  
4

5  
6 15 **Objectives**  
7

8 16 To investigate individual, interpersonal and environmental baseline factors predicting regular aerobic  
9  
10 17 physical activity (PA) participation among older adults in Germany at follow-up 12 years later.

11  
12 18 **Design**  
13

14 19 Population-based cohort study.

15  
16 20 **Setting**  
17

18 21 Cluster-randomized general population sample selected based on population registry address  
19  
20 22 information from 130 nationally distributed sample points collected from 1997-1999 and re-  
21  
22 23 evaluated 12 years later from 2008-2011.

24 24 **Participants**  
25

26 25 1184 adults, aged 65 years or older at follow-up with complete data at baseline and follow-up were  
27  
28 26 included in the final study sample.

29  
30 31 **Outcome measure**  
32

33 32 Regular 'aerobic PA  $\geq$  1 day/week' assessed based on self-reported information.

34  
35 35 **Results**  
36

37 30 At follow-up, 53.2 % of the participants engaged in aerobic PA  $\geq$  1 day/week. Participants aged 50 to  
38  
39 31 60 years at baseline were more likely to engage in aerobic PA  $\geq$  1 day/week than participants aged 61  
40  
41 32 to 78 years; odds ratio (OR): 1.88, 95% CI: 1.46-2.40. Participants with middle and high  
42  
43 33 socioeconomic status (SES) were more likely to engage in aerobic PA  $\geq$  1 day/week than participants  
44  
45 34 with low SES; OR middle SES: 2.08, 1.33-3.25; high SES 3.44, 2.11-5.60. Participants with high social  
46  
47 35 support were more likely to engage in aerobic PA  $\geq$  1 day/week at follow up than participants with  
48  
49 36 low social support; OR 1.98, 1.26-3.12. Furthermore, participants who engaged in leisure-time PA at  
50  
51 37 least once per week at baseline were more likely to engage in aerobic PA  $\geq$  1 day/week at follow up  
52  
53 38 than those who engaged less than once per week; OR 1.95, 1.46-2.60.  
54  
55

56 39  
57  
58  
59  
60

## 40 **Conclusions**

41 Several influencing factors assessed at baseline predicted regular aerobic PA participation twelve  
42 years later. These factors should be considered when planning interventions to prevent physical  
43 inactivity in older adults. There is great potential to increase aerobic PA participation in older adults  
44 in Germany, in particular among those with low SES and low social support.

## 46 **Keywords**

47 Physical activity, determinants, healthy aging, older people, Germany

## 49 **Strengths and limitations of this study**

- 50 • This study pairs some of the advantages of a nationwide, population-based survey with a  
51 cohort study design
- 52 • Another strength is the long average follow-up period of 12 years
- 53 • A limitation is the assessment of the outcome indicators with self-reports on physical activity  
54 level that are prone to recall and social desirability bias
- 55 • The study sample size of 1184 persons is appropriate to conduct analysis based on the whole  
56 sample but limited to conduct sub-group analysis

## 57 **Background**

58 In Germany 50 % of adults aged 65 years and older suffer from at least three chronic diseases [1].  
59 Physical activity (PA) can play a major role in preventing multimorbidity in this age group because of  
60 the wide range of health conditions which can be positively influenced by PA [2]. Regular PA in older  
61 adults contributes to a variety of health benefits such as lower risks of cardiovascular diseases [3],  
62 functional limitations [4], dementia [5] and all-cause mortality [6] as well as better psychological  
63 wellbeing [3]. Furthermore, PA plays an important role in the treatment and management of many  
64 chronic diseases and conditions such as hypertension, hyperlipidemia, type 2 diabetes and obesity  
65 [3]. Low intensity PA can improve the health status of the sedentary elderly and moderate and  
66 vigorous intensity aerobic PAs may be even more beneficial [4, 7, 8]. The World Health Organization  
67 (WHO) recommends that older adults engage in moderate intensity aerobic PA of at least 150  
68 minutes per week or vigorous intensity aerobic PA of at least 75 minutes per week [9]. However, in  
69 many countries the majority of the elderly population does not achieve the WHO recommendation  
70 [10]. In Germany, three quarters of women and three fifths of men aged 65 years and older engage  
71 in less than 150 minutes of aerobic PA per week and half of them engage in less than one day per  
72 week of aerobic PA [11]. In the context of population ageing, this observation demonstrates the  
73 potential of PA promotion to support healthy ageing, which is defined by the WHO as 'developing  
74 and maintaining the functional ability that enables well-being in older age' [2]. Therefore, to  
75 effectively promote PA and plan interventions, further knowledge is needed about factors  
76 influencing PA in older adults and groups at risk for an inactive lifestyle. Ecological models are  
77 commonly used to select and structure determinants of PA behaviour [12]. These models imply that  
78 factors from multiple levels (e.g. individual, interpersonal, environment, policy and global) influence  
79 PA. PA behaviour of older adults is structured in a similar way, with multiple levels of influencing  
80 factors: individual factors, e.g. age, sex and physical health [13, 14], interpersonal factors, e.g. living  
81 with a spouse and social support [14] and environmental factors, e.g. the built environment [13, 15].

1  
2  
3  
4  
5  
6  
7  
8  
9  
10  
11  
12  
13  
14  
15  
16  
17  
18  
19  
20  
21  
22  
23  
24  
25  
26  
27  
28  
29  
30  
31  
32  
33  
34  
35  
36  
37  
38  
39  
40  
41  
42  
43  
44  
45  
46  
47  
48  
49  
50  
51  
52  
53  
54  
55  
56  
57  
58  
59  
60

82 However, the evidence in the literature on determinants of regular PA in older adults based on  
83 cohort study data is limited [13].

84 This study aimed to investigate predictors of regular aerobic PA among older adults living in Germany  
85 using data from a nationwide, population-based cohort study.

## 86 **Methods**

### 87 **Study design and participants**

88 Data from the German National Health Interview and Examination Survey for adults 1997-99  
89 (GNHIES98) baseline survey and its first follow-up wave 2008-11 (DEGS1) were used. GNHIES98 and  
90 DEGS1 are components of the national German Federal Health Monitoring programme, operated by  
91 the Robert Koch Institute, which monitors the health status and health behaviour of adults 18 years  
92 and older in Germany. The survey study design is described in detail elsewhere [16, 17]. In summary,  
93 GNHIES98 and DEGS1 are both nationwide, population-based health examination surveys. Individuals  
94 from the general adult population were randomly selected in 130 nationally distributed sample  
95 points using a two-stage clustered sampling procedure: initially communities were sampled (primary  
96 sample unit) and within these communities address information was randomly drawn from local  
97 population registries. Institutionalized persons were excluded from the study sample. The GNHIES98  
98 sample was comprised of 7124 participants between the ages of 18 and 79 years and the DEGS1  
99 sample of 8152 participants between the ages of 18 and 91 years [18, 19]. Interviews, examinations  
100 and tests were carried out in both surveys. GNHIES98 data collection was conducted from October  
101 1997 to March 1999 and DEGS1 data collection was conducted from November 2008 to December  
102 2011. GNHIES98 was approved by the Board of the Federal Commissioner for Data Protection Berlin.  
103 DEGS1 was approved by the Federal and State Commissioners for Data Protection and by the ethics  
104 committee of the Charité – University Medicine Berlin (No. EA2/047/08). All participants provided  
105 informed written consent.

1  
2  
3 106 The response rates were 61 % for GNHIES98 and 62 % for DEGS1 [18, 19]. All GNHIES98 participants  
4  
5 107 were invited to participate in the DEGS1 follow-up survey. To improve the re-participation rate  
6  
7 108 participants who moved away or were not willing or able to visit the examination centre had the  
8  
9 109 opportunity to take part in an interview programme. GNHIES98 participants were enrolled in DEGS1  
10  
11 110 between 10 and 15 years after GNHIES98 participation; 91 % participated 11 to 13 years after  
12  
13 111 GNHIES98. The age range of the study sample for analysis was defined as participants aged 65 years  
14  
15 112 or older at follow-up (DEGS1). This included persons who were aged 50 years or above at baseline  
16  
17 113 (GNHIES98). A flow chart of participants is shown in Figure 1. 50.5 % (n = 1501) of GNHIES98  
18  
19 114 participants, aged 65 years or older at follow-up, participated in DEGS1. Of the 49.5 % non-  
20  
21 115 participants, 19.3 % (n = 575) had died during the follow-up period. A lower re-participation rate was  
22  
23 116 observed for men, older participants, participants with lower socioeconomic status (SES),  
24  
25 117 participants with chronic disease as well as those with lower leisure time PA level (Additional file 1).  
26  
27 118 The final study sample included 1184 participants after the exclusion of participants who were  
28  
29 119 younger than 65 years at follow-up (n = 220) and participants with missing data for the PA outcome  
30  
31 120 variable (n = 97). The multivariate analysis was conducted based on a complete-case sample (n =  
32  
33 121 1143); thus an additional 41 participants were excluded due to missing data for at least one of the  
34  
35 122 covariates used.

### 39 123 **Patient and public involvement**

40  
41  
42 124 Patients or public were not involved.

### 43 44 45 125 **Definition of variables**

#### 46 47 48 126 *Outcome variable*

49  
50  
51 127 The participants were asked at follow-up about the number of days and the duration on an average  
52  
53 128 day they engaged in physical activities which made them sweat or get out of breath in an average  
54  
55 129 week. The reference period was the last three months. A dichotomous variable was constructed with



1  
2  
3 130 the categories: 'aerobic PA  $\geq 1$  day per week'; Yes/No. This cut-off point was chosen because regular  
4  
5 131 aerobic PA on a weekly basis is associated with substantial health benefits [3].  
6  
7

8 132 *Predictor variables*  
9

10 133 The information used for constructing the exposure variables was assessed in the baseline survey  
11  
12 134 (GNHIES98) with self-administered questionnaires, physician-administered computer-assisted  
13  
14 135 personal interviews (CAPI) or physical examinations. The variables were selected based on theories  
15  
16 136 and evidence available in the literature [12, 20]. According to the ecological model, individual  
17  
18 137 (demographic variables, health status), interpersonal (living with a spouse, social support), health  
19  
20 138 behavioural (LTPA, participation in a health behaviour change programme, smoking status) and  
21  
22 139 environmental (size of and satisfaction with the living area) factors were included in the analysis.  
23  
24  
25

26 140 Individual factors  
27  
28

29 141 Participant SES was assessed using an index based on the educational level, household income and  
30  
31 142 occupational status of the participants which has been described in detail elsewhere [21]. The  
32  
33 143 prevalence of chronic diseases was assessed during the CAPI. Participants were defined as 'having a  
34  
35 144 chronic disease' if they indicated diagnosis by a physician of at least one of the following diseases:  
36  
37 145 coronary heart disease, stroke, diabetes, respiratory disease or cancer. Participant body mass index  
38  
39 146 (BMI) was calculated using measured participant weight and height. According to the guidelines of  
40  
41 147 the WHO, obesity was defined as BMI  $\geq 30$  kg/m<sup>2</sup> [22].  
42  
43

44 148 Interpersonal factors  
45  
46

47 149 Participants were defined as 'living with a spouse' if they indicated marriage or co-habitation with  
48  
49 150 their spouse. The question 'How many people are so close to you that you can count on them if you  
50  
51 151 have serious personal problems?' derived from the Oslo-3 Social Support Scale [23] was used as  
52  
53 152 proxy variable for social support. Two categories were constructed: 'low social support' (1 person or  
54  
55 153 none) and 'high social support' (at least 2 persons).  
56  
57  
58  
59  
60

1  
2  
3 154 Behavioural factors  
4

5  
6 155 'Leisure time physical activity' (LTPA) was assessed with the question, 'On average, how often do you  
7  
8 156 do sports activities or other physical activities in your leisure time, which make you sweat or out of  
9  
10 157 breath?'. The five answer categories were summarised into 2 categories: 'weekly LTPA' (daily/3 to 6  
11  
12 158 times a week/1 to 2 times a week) and 'no weekly LTPA' (once a month/never). 'Participation in at  
13  
14 159 least one health behaviour change programme' (abbreviated as 'at least one health programme') was  
15  
16 160 defined if participants reported participation in a programme with the topic 'weight reduction',  
17  
18 161 'healthy nutrition', 'back training' or 'stress management' during the last twelve months [24]. The  
19  
20 162 variable should be an indicator for health oriented behaviour. Participants were defined as 'smoker'  
21  
22 163 if they reported that they currently smoke and were defined as 'non-smoker' if they identified as a  
23  
24 164 former smoker or as having never smoked.  
25

26  
27 165 Environmental factors  
28

29  
30 166 A 'residential area size' variable was constructed with four categories: 'rural area' (< 5000  
31  
32 167 inhabitants); 'small-sized city' (5000 - < 20,000 inhabitants); 'medium-sized city' (20,000 - < 100,000  
33  
34 168 inhabitants); 'metropolitan city' ( $\geq$  100,000 inhabitants). For a subjective estimation of the  
35  
36 169 environment, participants were asked to rate 'satisfaction with their living area' on a 7-point scale  
37  
38 170 (from 1 'very unsatisfied' to 7 'very satisfied'). A dichotomous variable was constructed with the  
39  
40 171 categories 'not satisfied' (points 1-5) and 'satisfied' (points 6 and 7).  
41  
42

43  
44 172 **Statistical analyses**  
45

46  
47 173 All statistical analyses were performed with the survey design procedure of Stata 14.1 to adjust for  
48  
49 174 cluster design. P-values less than 0.05 were defined as statistically significant. Predictors of aerobic  
50  
51 175 PA  $\geq$ 1 day/week were investigated in two steps: first, bivariate analyses were performed and,  
52  
53 176 second, exposure variables that were significantly associated with the outcome in the bivariate  
54  
55 177 analysis ( $p < .05$ ) were included in a stepwise logistic regression analysis. Bivariate associations  
56  
57 178 between the exposure and outcome variables were analysed with the Pearson's chi-squared test  
58  
59

1  
2  
3 179 with Rao-Scott correction. In the logistic regression, odds ratios (OR) and 95 % confidence intervals  
4  
5 180 (CI) were estimated to examine the associations between baseline exposure variables and  
6  
7 181 participation in aerobic PA  $\geq 1$  day/week at follow-up. During the stepwise analysis three models  
8  
9 182 were investigated: Model 1 included individual factors (sex, age, SES, chronic disease and obesity), in  
10  
11 183 Model 2 the interpersonal factors living with a spouse and social support were added, in Model 3 the  
12  
13 184 behavioural variables were added (LTPA, at least one health programme). To detect multicollinearity  
14  
15 185 between the covariates, variance inflation factors (VIF) were calculated. All VIFs were less than 1.5  
16  
17 186 and thus clearly lower than the common threshold for multicollinearity of 10 [25]. To investigate  
18  
19 187 whether the predictors of aerobic PA  $\geq 1$  day/week differ between men and women and between  
20  
21 188 different age groups, age and sex interaction analyses were performed for all associations presented  
22  
23 189 in Model 3.

## 190 **Results**

### 191 **Participants**

192 52.5 % (n = 622) of the participants were women. The mean age of the participants at baseline was  
193 60 years (range 50-78 years) and at follow-up 72 years (range 65-91 years). 60.2 % (n = 713) were in  
194 the age group '50-60 years' at baseline and 39.8 % (n = 471) in the age group '61-78 years'. The  
195 description of the participants according to socio-demographic, health-related, interpersonal,  
196 behavioural and environmental variables at baseline is presented in Table 1. When comparing  
197 participants from the older age group (61-78 years) to participants from the younger age group (50-  
198 60 years) at baseline, older participants had high SES less often, had a chronic disease more often,  
199 lived with a spouse less often, participated in LTPA less often, participated in a health programme  
200 less often and smoked less often than younger participants (each p < .05).

### 201 **Aerobic PA $\geq 1$ day/week**

1  
2  
3 202 53.2 % of the participants engaged in aerobic PA  $\geq 1$  day/week at follow up. No significant difference  
4  
5 203 was observed between men and women (55.3 % vs 51.3 %;  $p = .158$ ). The prevalence of engaging in  
6  
7 204 aerobic PA  $\geq 1$  day/week (41.2 %) was lower at baseline among the 61-78 year age group than among  
8  
9 205 the 50-60 year age group, where prevalence was 61.2 % ( $p < .001$ ). The prevalence of aerobic PA  $\geq 1$   
10  
11 206 day/week according to baseline socio-demographic, health-related, behavioural, social and  
12  
13 207 environmental variables is shown in Table 2.

### 16 208 **Predictors of engaging in aerobic PA $\geq 1$ day/week**

18  
19 209 Binary analyses showed (Table 2) that age, SES, chronic disease, obesity, living with a spouse, social  
20  
21 210 support, LTPA and participation in at least one health programme at baseline were significantly  
22  
23 211 associated with aerobic PA  $\geq 1$  day/week at follow-up.

24  
25  
26 212 Multivariate analyses showed that age, SES, social support and LTPA were predictors for aerobic PA  
27  
28 213  $\geq 1$  day/week at follow-up (Table 3). The results of Model 3 (all binary significant variables included)  
29  
30 214 indicated that participants aged 50 to 60 years were more likely to engage in aerobic PA  $\geq 1$  day/week  
31  
32 215 than participants aged 61 to 78 years, with an OR of 1.88 (95% CI, 1.46-2.40). Participants with  
33  
34 216 middle or high SES were more likely to engage in aerobic PA  $\geq 1$  day/week than participants with low  
35  
36 217 SES, with an OR of 2.08 (1.33-3.25) for middle SES and 3.44 (2.11-5.60) for high SES. Participants with  
37  
38 218 high social support were more likely to engage in aerobic PA  $\geq 1$  day/week at follow up than  
39  
40 219 participants with a low social support, with an OR of 1.98 (1.26-3.12). Furthermore, participants who  
41  
42 220 participate in LTPA every week at baseline were more likely to engage in aerobic PA  $\geq 1$  day/week at  
43  
44 221 follow up than inactive participants, with an OR of 1.95 (1.46-2.60).

### 48 222 **Subgroup analyses**

49  
50  
51 223 The interaction analyses showed that age was an effect modifier for the association between SES and  
52  
53 224 aerobic PA  $\geq 1$  day/week and for the association between social support and aerobic PA  $\geq 1$  day/week  
54  
55 225 (interaction term age\*middle SES:  $p = .033$ ; age\*high SES:  $p < .001$ ; age\*social support:  $p < .001$ ).

56  
57 226 Subgroup analyses showed that SES was a significant determinant of aerobic PA  $\geq 1$  day/week only in

1  
2  
3 227 the age group 65 to 72 years but not in the age group 73 to 91 years. Participants in this age group  
4  
5 228 with middle or high SES were more likely to engage in aerobic PA  $\geq 1$  day/week than participants with  
6  
7 229 low SES (middle SES: 3.02, 1.70-5.37; high SES: 6.62, 3.74-11.72). Furthermore, social support was  
8  
9 230 only a significant determinant of aerobic PA  $\geq 1$  day/week among participants 65 to 72 years.  
10  
11 231 Participants in this age group with higher social support were more likely to engage in aerobic PA  $\geq 1$   
12  
13 232 day/week, with an OR of 3.31 (1.76-6.21). Sex was not an effect modifier for any of the presented  
14  
15 233 associations.

## 18 234 **Discussion**

21 235 In this nationwide, population-based cohort study it was observed that half of the older adults 65+  
22  
23 236 years in Germany did not engage in aerobic PA at least one day per week. The multivariate analyses  
24  
25 237 showed that the groups at high risk for having an inactive lifestyle at age 65+ years were those who,  
26  
27 238 12 years earlier, were in the older age groups, those with low socio-economic position, low social  
28  
29 239 support and low previous levels of PA. Several additional determinants of aerobic PA identified in  
30  
31 240 binary analyses were no longer associated with the outcome after multivariate adjustment.

## 34 241 **Individual factors**

37 242 Sex was not a predictor for aerobic PA  $\geq 1$  day/week in older adults in the present study. Other  
38  
39 243 studies with older adults showed mixed results with a tendency to report a higher PA level for men  
40  
41 244 [10, 13, 14]. A time trend analysis on the prevalence of physical inactivity among German adults aged  
42  
43 245 25 to 69 years over an observation period of 20 years demonstrated that gender differences  
44  
45 246 observed in the first 1990-92 survey diminished over time so that women were no longer more  
46  
47 247 inactive than men in the 2008-2011 survey [26]. The higher proportion of women than men aged 65  
48  
49 248 years and older living in Germany participating in PA courses as part of primary prevention  
50  
51 249 programmes [24] might explain the similar PA prevalence in this study.

1  
2  
3 250 The observed lower odds for participation in aerobic PA  $\geq 1$  day/week with higher age in the present  
4  
5 251 study are consistent with other studies [10, 13, 14, 27]. The loss of physical function as well as the  
6  
7 252 fear of injuries and falling may play a role in the reduction of the PA level with progression of age  
8  
9 253 [28]. A qualitative study showed that older adults still believe that PA is inappropriate for older  
10  
11 254 people and might be even harmful [28, 29]. Furthermore, a cohort effect might explain, at least  
12  
13 255 partly, the differences between age groups. Beginning in the 1970s, the number of recreational sport  
14  
15 256 offers started to increase in Germany [30], thus the younger age group in the previously mentioned  
16  
17 257 study (22-32 years old in 1970) might have benefited more than the older age group.  
18  
19  
20 258 Consistent with the findings reported in other studies, older adults with higher SES participated more  
21  
22 259 often in aerobic PA  $\geq 1$  day/week later in life than persons with low SES [14, 27, 31]. More social and  
23  
24 260 material resources and more PA friendly neighbourhoods may partly explain the higher activity level  
25  
26 261 of older adults with a higher SES [31, 32]. Another important factor might be the difference in PA  
27  
28 262 behaviour earlier in life. Adults with higher levels of education are more physically active in leisure  
29  
30 263 time, perhaps to compensate for work-related inactivity, whereas adults with lower levels of  
31  
32 264 education may have higher PA level during their work time [33, 34]. With age and retirement it is  
33  
34 265 likely that adults who participate in leisure time PA continue these activities, whereas adults who had  
35  
36 266 only experienced work-related activity may become inactive.  
37  
38  
39  
40 267 The results of this study suggest that chronic disease developed earlier in life is not a predictor of  
41  
42 268 aerobic PA  $\geq 1$  day/week in older adults. A cross-sectional study [31] also observed no relationship  
43  
44 269 between diabetes and hypertension and PA in older adults. However, other prospective studies  
45  
46 270 showed that older adults with poor health status were less likely to be physically active [13, 14, 35].  
47  
48 271 Prescribed PA is part of the therapy of several chronic diseases like heart disease and diabetes. Thus,  
49  
50 272 chronic diseases can act as both barriers to or motivations for PA, which may blur the association  
51  
52 273 over time. It is possible that such a blurring of the association between chronic disease and PA may  
53  
54 274 have occurred in our study. Moreover, participants with chronic diseases had a lower probability of  
55  
56  
57  
58  
59  
60

1  
2  
3 275 re-participation (see Additional File 1), reducing the possibility of rigorously investigating the long-  
4  
5 276 term association between chronic diseases and aerobic PA  $\geq 1$  day/week in our study sample.  
6  
7  
8 277 Furthermore, obesity was not a predictor of the outcome aerobic PA  $\geq 1$  day/week. Results of  
9  
10 278 prospective studies investigating the influence of obesity on PA in the elderly are inconsistent. The  
11  
12 279 authors of a review concluded that the influence of obesity on PA is weak [14], whereas the results of  
13  
14 280 the English Longitudinal Study of Aging observed that obesity is associated with a lower likelihood of  
15  
16 281 being persistently active [27]. Similar to chronic diseases, obesity may, on the one hand, result in a  
17  
18 282 lower PA level or, on the other hand, as part of a therapy may encourage an increase in activity level.  
19  
20 283 The different directions of this association make it difficult to evaluate the effect of obesity on PA.  
21  
22

#### 23 284 **Interpersonal factors**

24  
25  
26 285 The results of this study suggest that interpersonal factors are important predictors of engaging in  
27  
28 286 aerobic PA  $\geq 1$  day/week in older adults. Participants with higher social support were more likely to  
29  
30 287 participate in aerobic PA  $\geq 1$  day/week. Social networks could promote physical activity among older  
31  
32 288 adults by providing information, connecting older adults to resources, such as transport services, and  
33  
34 289 providing encouragement [28, 32]. The results are in line with a cross-sectional study which observed  
35  
36 290 that in elderly people social isolation is related to negative health behaviour like physical inactivity  
37  
38 291 [36, 37]. Living with a spouse was not a significant predictor in this analysis but older adults with a  
39  
40 292 partner tended to be more physical active. Further studies observed that older adults who are  
41  
42 293 married are more likely to participate in physical activities later in life [14].  
43  
44  
45

#### 46 294 **Behavioural factors**

47  
48  
49 295 In the current study, former weekly LTPA was a predictor of aerobic PA  $\geq 1$  day/week in older adults.  
50  
51 296 Several studies observed that PA participation earlier in life is an important determinant of physical  
52  
53 297 behaviour among older adults, in line with our observations [29, 38]. Experiences about physical  
54  
55 298 competence as well as a positive attitude towards PA could explain the tracking of PA behaviour later  
56  
57 299 in life [29].  
58  
59

1  
2  
3 300 Participation in at least one PA related health programme was not a significant predictor of aerobic  
4  
5 301 PA  $\geq 1$  day/week twelve years later. It could be that programmes such as back training and stress  
6  
7 302 management, did not prioritize the promotion of aerobic PA and thus that participation in these  
8  
9 303 programmes had no positive effect on aerobic PA  $\geq 1$  day/week. It could also be that the programmes  
10  
11 304 increased PA level in short-term but there were no long-term effects on aerobic PA level twelve years  
12  
13 305 later.

14  
15  
16 306 In this study, smoking was not associated with aerobic PA  $\geq 1$  day/week later in life, contrary to  
17  
18 307 studies demonstrating that health risk behaviour like smoking and physical inactivity often cluster  
19  
20 308 [14, 27]. Due to the high proportion of adults aged 65 years and older living in Germany who quit  
21  
22 309 smoking [39], an explanation for the absence of an association between smoking and PA later in life  
23  
24 310 might be that many participants quit smoking during the follow-up period.

### 25 26 27 311 **Environmental factors**

28  
29  
30 312 The environmental factors investigated in the current study did not predict aerobic PA  $\geq 1$  day/week  
31  
32 313 in older adults. Environmental characteristics such as urbanization and satisfaction with the living  
33  
34 314 area are probably long-term characteristics, for which the impact on individual PA behaviour may  
35  
36 315 already have appeared earlier in life. Also, after adjustment for intermediate variables like PA at  
37  
38 316 baseline, the additional contribution seems small. Furthermore, participants might have moved to  
39  
40 317 another residential area so that the former residential area has minor influence on the activity  
41  
42 318 behaviour twelve years later. Two reviews investigated the relationship between the environmental  
43  
44 319 factors within the neighbourhood and PA in older adults and came up with contradictory findings.  
45  
46 320 The authors of one review [40] concluded that the majority of studies reviewed observed no  
47  
48 321 relationship between environmental factors (objectively and subjectively measured) and PA  
49  
50 322 behaviour of older adults. The authors of the other review [15] determined that characteristics of the  
51  
52 323 built environment (objectively measured) are associated with the PA of older adults. Differences in  
53  
54  
55  
56  
57  
58  
59  
60



1  
2  
3 324 the assessment of environmental characteristics as well as PA could be reasons for the differing  
4  
5 325 results.

6  
7  
8 326 **Age interactions**

9  
10 327 SES and social support were not significant predictors of aerobic PA  $\geq 1$  day/week in the older age  
11  
12 328 group but were significant predictors in the younger age group. One explanation for this could be a  
13  
14 329 decline in the prevalence of aerobic PA with increasing age leading to weaker influence of the  
15  
16 330 predictors. A lower PA prevalence also leads to a lower statistical power to determine significant  
17  
18 331 associations.

19  
20  
21  
22 332 **Strengths and limitations**

23  
24 333 This study pairs some of the advantages of a nationwide, population-based survey with a high degree  
25  
26 334 of representativeness and a cohort study design which provides stronger information on causal  
27  
28 335 inference. Great efforts were made at all stages while conducting GNHIES89 and DEGS1 to reduce  
29  
30 336 potential sources of bias [16, 17]. This comprised measures such as internal and external quality  
31  
32 337 control during field work, anonymous data collection and record keeping, data quality assurance and  
33  
34 338 use of accurate instruments. However, self-reports on PA level are prone to recall and social  
35  
36 339 desirability bias [41]. Thus we cannot exclude the possibility that aerobic PA  $\geq 1$  day/week was over-  
37  
38 340 reported. Also, most of the independent variables were based on self-reports involving the potential  
39  
40 341 of reporting bias. Selection bias could have appeared at different stages (selection of individuals into  
41  
42 342 the study, loss to follow-up, item non response). This may have influenced the results and may  
43  
44 343 compromise the generalizability of the findings. For instance, we were not able to consider  
45  
46 344 information from participants who had died during the follow-up period. Non-response analysis  
47  
48 345 indicates that the non-responders were older, had a lower level of LTPA and SES on average and  
49  
50 346 more often chronic diseases and obesity compared to the responders. This suggests that the  
51  
52 347 responders are a healthier and fitter group than the non-responders and that the prevalence of  
53  
54 348 aerobic PA  $\geq 1$  day/week at follow-up might be overestimated. In addition, the study results might

1  
2  
3 349 not apply to elderly individuals living in a nursing home who were not eligible for inclusion into the  
4  
5 350 study sample.  
6

7  
8 351 **Conclusion**  
9

10 352 Despite limitations, we conclude that several influencing factors assessed at baseline predicted  
11  
12 353 regular aerobic PA participation twelve years later. These factors should be considered when  
13  
14 354 planning interventions to prevent physical inactivity in older adults. Aerobic PA has many benefits for  
15  
16 355 aging people and can improve their life in many ways. There is great potential for increasing aerobic  
17  
18 356 PA participation in older adults in Germany. Low PA levels among older adults indicate the need for  
19  
20 357 PA promotion interventions tailored for this age group. Measures promoting a physically active  
21  
22 358 lifestyle during middle age, e.g. through workplace interventions, may have positive long-term  
23  
24 359 effects on PA level at older age due to the strong tracking of PA behaviour. Target groups for PA  
25  
26 360 interventions at middle age should be people with low SES and low social support to prevent low PA  
27  
28 361 levels later in life.  
29  
30  
31  
32  
33  
34  
35  
36  
37  
38  
39  
40  
41  
42  
43  
44  
45  
46  
47  
48  
49  
50  
51  
52  
53  
54  
55  
56  
57  
58  
59  
60

1  
2  
3 362 **Additional material**  
4

5  
6 363 Additional File 1: DEGS1 unit nonresponse analysis, differences in selected baseline characteristics  
7  
8 364 between DEGS1 non-respondents and respondents.  
9

10  
11 365 **Abbreviations**  
12

13  
14 366 BMI – body mass index; CAPI – physician-administered computer assisted personal interview; DEGS –  
15  
16 367 German Health Interview and Examination Survey for Adults 2008-11; GNHIES98 – German National  
17  
18 368 Health Interview and Examination Survey 1997-99; OR – odds ratio; PA – physical activity; SES –  
19  
20 369 socioeconomic status; WHO – World Health Organization  
21  
22

23  
24 370 **Declarations**  
25

26  
27 371 **Ethics approval and consent to participate**  
28

29  
30 372 The study GNHIES98 was approved by the Board of the Federal Commissioner Data Protection Berlin.  
31  
32 373 DEGS1 was approved by the Federal and State Commissioners for Data Protection and by the Charité  
33  
34 374 – University Medicine Berlin ethic committee (No. EA2/047/08). All participants provided informed  
35  
36 375 written consent.  
37

38  
39 376 **Consent for publication**  
40

41  
42 377 Not applicable.  
43  
44

45 378 **Competing interests**  
46

47  
48 379 The authors declare that they have no competing interests.  
49  
50

51 380 **Availability of data and materials**  
52  
53  
54  
55  
56  
57  
58  
59  
60

1  
2  
3 381 Datasets of GNHIES98 and DEGS1 are available via Public Use File  
4  
5 382 ([http://www.rki.de/DE/Content/Gesundheitsmonitoring/Forschungsdatenzentrum/informationen\\_a](http://www.rki.de/DE/Content/Gesundheitsmonitoring/Forschungsdatenzentrum/informationen_a)  
6  
7 383 [ntrag/info\\_antrag\\_node.html](http://www.rki.de/DE/Content/Gesundheitsmonitoring/Forschungsdatenzentrum/informationen_a_ntrag/info_antrag_node.html)).  
8  
9

#### 10 384 **Funding**

11  
12  
13 385 The Health Surveys GNHIES98 and DEGS1 are funded by the Federal Ministry of Health Germany.  
14  
15

#### 16 386 **Authors' contributions**

17  
18  
19 387 GBMM was involved in the design and conduct of GNHIES98 and DEGS1 in particular for the physical  
20  
21 388 activity questions. SK and KM conceptualized the current study. KM conducted the present analysis  
22  
23 389 and GBMM, SJ, AS and JDF contributed to the analysis plan and interpretation of the results. KM  
24  
25 390 drafted the manuscript and GBMM, SJ, AS, SK and JDF critically revised it. JDF contributed to writing  
26  
27 391 the manuscript. All authors contributed to interpretation of findings, reviewed, edited and approved  
28  
29 392 the final manuscript.  
30  
31

#### 32 393 **Acknowledgements**

33  
34  
35  
36 394 We thank Katherine Ombrellaro for proofreading and language editing.  
37  
38  
39  
40  
41  
42  
43  
44  
45  
46  
47  
48  
49  
50  
51  
52  
53  
54  
55  
56  
57  
58  
59  
60

1  
2  
3 395 **References**  
4 396  
5 397  
6 398  
7 399  
8 400  
9 401  
10 402  
11 403  
12 404  
13 405  
14 406  
15 407  
16 408  
17 409  
18 410  
19 411  
20 412  
21 413  
22 414  
23 415  
24 416  
25 417  
26 418  
27 419  
28 420  
29 421  
30 422  
31 423  
32 424  
33 425  
34 426  
35 427  
36 428  
37 429  
38 430  
39 431  
40 432  
41 433  
42 434  
43 435  
44 436  
45 437  
46 438  
47 439  
48 440  
49 441  
50 442  
51 443  
52 444  
53 445  
54  
55  
56  
57  
58  
59  
60

1. Fuchs J, Busch M, Lange C, Scheidt-Nave C: **Prevalence and patterns of morbidity among adults in Germany. Results of the German telephone health interview survey German Health Update (GEDA) 2009.** *Bundesgesundheitsblatt Gesundheitsforschung Gesundheitsschutz* 2012, **55**(4):576-586.
2. World Health Organization: **World report on ageing and health.** Geneva, Switzerland: World Health Organization; 2015.
3. Chodzko-Zajko WJ, Proctor DN, Fiatarone Singh MA, Minson CT, Nigg CR, Salem GJ, Skinner JS: **American College of Sports Medicine position stand. Exercise and physical activity for older adults.** *Med Sci Sports Exerc* 2009, **41**(7):1510-1530.
4. Paterson DH, Warburton DE: **Physical activity and functional limitations in older adults: a systematic review related to Canada's Physical Activity Guidelines.** *Int J Behav Nutr Phys Act* 2010, **7**:38.
5. Hamer M, Chida Y: **Physical activity and risk of neurodegenerative disease: a systematic review of prospective evidence.** *Psychol Med* 2009, **39**(1):3-11.
6. Stessman J, Hammerman-Rozenberg R, Cohen A, Ein-Mor E, Jacobs JM: **Physical activity, function, and longevity among the very old.** *Arch Intern Med* 2009, **169**(16):1476-1483.
7. Mensink GB, Ziese T, Kok FJ: **Benefits of leisure-time physical activity on the cardiovascular risk profile at older age.** *Int J Epidemiol* 1999, **28**(4):659-666.
8. Hupin D, Roche F, Gremeaux V, Chatard JC, Oriol M, Gaspoz JM, Barthelemy JC, Edouard P: **Even a low-dose of moderate-to-vigorous physical activity reduces mortality by 22% in adults aged >=60 years: a systematic review and meta-analysis.** *Br J Sports Med* 2015, **49**(19):1262-1267.
9. World Health Organization: **Global recommendations on physical activity for health.** Geneva, Switzerland: World Health Organization; 2010.
10. Sun F, Norman IJ, While AE: **Physical activity in older people: a systematic review.** *BMC Public Health* 2013, **13**:449.
11. Robert Koch-Institut: **Daten und Fakten: Ergebnisse der Studie "Gesundheit in Deutschland aktuell 2012".** Berlin: Robert-Koch-Inst.; 2014.
12. Bauman AE, Reis RS, Sallis JF, Wells JC, Loos RJ, Martin BW, Lancet Physical Activity Series Working G: **Correlates of physical activity: why are some people physically active and others not?** *Lancet* 2012, **380**(9838):258-271.
13. Koeneman MA, Verheijden MW, Chinapaw MJ, Hopman-Rock M: **Determinants of physical activity and exercise in healthy older adults: a systematic review.** *Int J Behav Nutr Phys Act* 2011, **8**:142.
14. Van Stralen M, De Vries H, Mudde A, Bolman C, Lechner L: **Determinants of initiation and maintenance of physical activity among older adults: a literature review.** *Health Psychology Review* 2009, **3**(2):147-207.
15. Rosso AL, Auchincloss AH, Michael YL: **The urban built environment and mobility in older adults: a comprehensive review.** *J Aging Res* 2011, **2011**:816106.
16. Bellach BM, Knopf H, Thefeld W: **The German Health Survey. 1997/98.** *Gesundheitswesen* 1998, **60 Suppl 2**:S59-68.
17. Scheidt-Nave C, Kamtsiuris P, Gosswald A, Holling H, Lange M, Busch MA, Dahm S, Dolle R, Ellert U, Fuchs J *et al*: **German health interview and examination survey for adults (DEGS) - design, objectives and implementation of the first data collection wave.** *BMC Public Health* 2012, **12**:730.
18. Kamtsiuris P, Lange M, Hoffmann R, Schaffrath Rosario A, Dahm S, Kuhnert R, Kurth BM: **The first wave of the German Health Interview and Examination Survey for Adults (DEGS1): sample design, response, weighting and representativeness.** *Bundesgesundheitsblatt Gesundheitsforschung Gesundheitsschutz* 2013, **56**(5-6):620-630.

- 1  
2  
3 446 19. Thefeld W, Stolzenberg H, Bellach BM: **The Federal Health Survey: response, composition of**  
4 447 **participants and non-responder analysis.** *Gesundheitswesen* 1999, **61 Spec No:**S57-61.
- 5 448 20. Koeneman MA, Chinapaw MJ, Verheijden MW, van Tilburg TG, Visser M, Deeg DJ, Hopman-  
6 449 **Rock M: Do major life events influence physical activity among older adults: the**  
7 450 **Longitudinal Aging Study Amsterdam.** *Int J Behav Nutr Phys Act* 2012, **9:**147.
- 8 451 21. Lampert T, Kroll L, Müters S, Stolzenberg H: **[Measurement of socioeconomic status in the**  
9 452 **German health interview and examination survey for adults (DEGS1)].**  
10 453 *Bundesgesundheitsblatt - Gesundheitsforschung - Gesundheitsschutz* 2013, **56(5):**631-636.
- 11 454 22. **BMI classification** [[http://apps.who.int/bmi/index.jsp?introPage=intro\\_3.html](http://apps.who.int/bmi/index.jsp?introPage=intro_3.html)]
- 12 455 23. Dalgard OS, Dowrick C, Lehtinen V, Vazquez-Barquero JL, Casey P, Wilkinson G, Ayuso-  
13 456 **Mateos JL, Page H, Dunn G, Group O: Negative life events, social support and gender**  
14 457 **difference in depression: a multinational community survey with data from the ODIN**  
15 458 **study.** *Soc Psychiatry Psychiatr Epidemiol* 2006, **41(6):**444-451.
- 16 459 24. Jordan S, von der Lippe E: **Participation in health behaviour change programmes: results of**  
17 460 **the German Health Interview and Examination Survey for Adults (DEGS1).**  
18 461 *Bundesgesundheitsblatt Gesundheitsforschung Gesundheitsschutz* 2013, **56(5-6):**878-884.
- 19 462 25. Hair JF: **Multivariate data analysis with readings.** Englewood Cliffs, N.J.: Prentice Hall; 1995.
- 20 463 26. Finger JD, Busch MA, Du Y, Heidemann C, Knopf H, Kuhnert R, Lampert T, Mensink GBM,  
21 464 **Neuhauser HK, Rosario AS et al: Time trends in cardiometabolic risk factors in adults -**  
22 465 **Results from three nationwide German examination surveys from 1990–2011.** *Deutsches*  
23 466 *Arzteblatt International* 2016, **113(42):**712-719.
- 24 467 27. Smith L, Gardner B, Fisher A, Hamer M: **Patterns and correlates of physical activity**  
25 468 **behaviour over 10 years in older adults: prospective analyses from the English Longitudinal**  
26 469 **Study of Ageing.** *BMJ Open* 2015, **5(4):**e007423.
- 27 470 28. Franco MR, Tong A, Howard K, Sherrington C, Ferreira PH, Pinto RZ, Ferreira ML: **Older**  
28 471 **people's perspectives on participation in physical activity: a systematic review and**  
29 472 **thematic synthesis of qualitative literature.** *Br J Sports Med* 2015, **49(19):**1268-1276.
- 30 473 29. Hirvensalo M, Lintunen T: **Life-course perspective for physical activity and LTPA.** *European*  
31 474 *Review of Aging and Physical Activity* 2011, **8(1):**13-22.
- 32 475 30. DaCosta L, Maragaya A: **Worldwide experiences and trends in sport for all.** Oxford: Meyer &  
33 476 **Meyer; 2002.**
- 34 477 31. Mesters I, Wahl S, Van Keulen HM: **Socio-demographic, medical and social-cognitive**  
35 478 **correlates of physical activity behavior among older adults (45-70 years): a cross-sectional**  
36 479 **study.** *BMC Public Health* 2014, **14:**647.
- 37 480 32. McNeill LH, Kreuter MW, Subramanian SV: **Social environment and physical activity: a**  
38 481 **review of concepts and evidence.** *Soc Sci Med* 2006, **63(4):**1011-1022.
- 39 482 33. Finger JD, Tyllleskar T, Lampert T, Mensink GB: **Physical activity patterns and socioeconomic**  
40 483 **position: the German National Health Interview and Examination Survey 1998 (GNHIES98).**  
41 484 *BMC Public Health* 2012, **12:**1079.
- 42 485 34. Hoebel J, Finger JD, Kuntz B, Kroll LE, Manz K, Lange C, Lampert T: **Changing educational**  
43 486 **inequalities in sporting inactivity among adults in Germany: a trend study from 2003 to**  
44 487 **2012.** *BMC Public Health* 2017, **17(1):**547.
- 45 488 35. Hakola L, Hassinen M, Komulainen P, Lakka TA, Savonen K, Rauramaa R: **Correlates of low**  
46 489 **physical activity levels in aging men and women: the DR's EXTRA Study (ISRCTN45977199).**  
47 490 *J Aging Phys Act* 2015, **23(2):**247-255.
- 48 491 36. Nicholson NR: **A review of social isolation: an important but underassessed condition in**  
49 492 **older adults.** *J Prim Prev* 2012, **33(2-3):**137-152.
- 50 493 37. Christiansen J, Larsen FB, Lasgaard M: **Do stress, health behavior, and sleep mediate the**  
51 494 **association between loneliness and adverse health conditions among older people?** *Soc Sci*  
52 495 *Med* 2016, **152:**80-86.

- 1  
2  
3 496 38. Hamer M, Kivimaki M, Steptoe A: **Longitudinal patterns in physical activity and sedentary**  
4 497 **behaviour from mid-life to early old age: a substudy of the Whitehall II cohort.** *J Epidemiol*  
5 498 *Community Health* 2012, **66**(12):1110-1115.  
6 499 39. Lampert T, von der Lippe E, Müters S: **Prevalence of smoking in the adult population of**  
7 500 **Germany: results of the German Health Interview and Examination Survey for Adults**  
8 501 **(DEGS1).** *Bundesgesundheitsblatt Gesundheitsforschung Gesundheitschutz* 2013, **56**(5-  
9 502 6):802-808.  
10 503 40. Van Cauwenberg J, De Bourdeaudhuij I, De Meester F, Van Dyck D, Salmon J, Clarys P,  
11 504 Deforche B: **Relationship between the physical environment and physical activity in older**  
12 505 **adults: a systematic review.** *Health Place* 2011, **17**(2):458-469.  
13 506 41. Ekelund U, Tomkinson G, Armstrong N: **What proportion of youth are physically active?**  
14 507 **Measurement issues, levels and recent time trends.** *Br J Sports Med* 2011, **45**(11):859-865.  
15  
16  
17  
18  
19  
20  
21  
22  
23  
24  
25  
26  
27  
28  
29  
30  
31  
32  
33  
34  
35  
36  
37  
38  
39  
40  
41  
42  
43  
44  
45  
46  
47  
48  
49  
50  
51  
52  
53  
54  
55  
56  
57  
58  
59  
60

For peer review only

1  
2  
3 508 **Figures**

4  
5 509 Figure 1: Flow diagram of participants

6  
7 510  
8  
9  
10  
11  
12  
13  
14  
15  
16  
17  
18  
19  
20  
21  
22  
23  
24  
25  
26  
27  
28  
29  
30  
31  
32  
33  
34  
35  
36  
37  
38  
39  
40  
41  
42  
43  
44  
45  
46  
47  
48  
49  
50  
51  
52  
53  
54  
55  
56  
57  
58  
59  
60

For peer review only



## 511 Tables

**Table 1: Baseline characteristics of the study sample (n = 1184)**

|                                | Missing | Age at baseline |             |      |             | Total | p-value     |         |
|--------------------------------|---------|-----------------|-------------|------|-------------|-------|-------------|---------|
|                                |         | %               | 95% CI      | %    | 95% CI      |       |             |         |
| <b>1 Individual factors</b>    |         |                 |             |      |             |       |             |         |
| Sex                            | 0       |                 |             |      |             |       |             |         |
| Women (n=622)                  |         | 53.0            | (49.5-56.5) | 51.8 | (48.2-55.3) | 52.5  | (49.8-55.3) | 0.600   |
| Men (n=562)                    |         | 47.0            | (43.5-50.5) | 48.2 | (44.7-51.8) | 47.5  | (44.7-50.2) |         |
| Socioeconomic status           | 14      |                 |             |      |             |       |             |         |
| Low (n=151)                    |         | 11.4            | (8.9-14.4)  | 15.2 | (11.9-19.2) | 12.9  | (10.6-15.7) | < 0.001 |
| Middle (n=712)                 |         | 57.5            | (53.5-61.3) | 66.0 | (61.6-70.1) | 60.9  | (57.8-63.8) |         |
| High (n=307)                   |         | 31.2            | (27.3-35.3) | 18.8 | (15.0-23.3) | 26.2  | (23.0-29.7) |         |
| Chronic disease                | 3       |                 |             |      |             |       |             |         |
| No (n=869)                     |         | 78.5            | (75.4-81.4) | 66.0 | (61.6-70.2) | 73.6  | (70.8-76.2) | < 0.001 |
| Yes (n=312)                    |         | 21.5            | (18.6-24.6) | 34.0 | (29.8-38.4) | 26.4  | (23.8-29.2) |         |
| Obesity                        | 3       |                 |             |      |             |       |             |         |
| Yes (n=297)                    |         | 24.5            | (20.8-28.5) | 26.2 | (22.3-30.4) | 25.1  | (22.2-28.4) | 0.504   |
| No (n=884)                     |         | 75.5            | (71.5-79.2) | 73.8 | (69.6-77.7) | 74.9  | (71.6-77.8) |         |
| <b>2 Interpersonal factors</b> |         |                 |             |      |             |       |             |         |
| Living with a spouse           | 16      |                 |             |      |             |       |             |         |
| No (n=216)                     |         | 16.7            | (14.0-19.7) | 21.2 | (17.7-25.3) | 18.5  | (16.2-21.1) | 0.035   |
| Yes (n=952)                    |         | 83.3            | (80.3-86.0) | 78.8 | (74.7-82.3) | 81.5  | (78.9-83.8) |         |
| Social support                 | 21      |                 |             |      |             |       |             |         |
| Low (n=100)                    |         | 7.6             | (5.7-10.0)  | 10.2 | (7.8-13.1)  | 8.6   | (7.0-10.5)  | 0.110   |
| High (n=1,063)                 |         | 92.4            | (90.0-94.3) | 89.8 | (86.9-92.2) | 91.4  | (89.5-93.0) |         |
| <b>3 Behavioural factors</b>   |         |                 |             |      |             |       |             |         |
| Leisure time physical activity | 26      |                 |             |      |             |       |             |         |
| Every week (n=784)             |         | 72.1            | (67.9-76.0) | 61.0 | (56.8-65.1) | 67.7  | (64.4-70.9) | < 0.001 |
| Not every week (n=374)         |         | 27.9            | (24.0-32.1) | 39.0 | (34.9-43.2) | 32.3  | (29.1-35.6) |         |
| At least one health programme  | 0       |                 |             |      |             |       |             |         |
| Yes (n=124)                    |         | 12.6            | (10.4-15.3) | 7.2  | (5.2-10.0)  | 10.5  | (8.8-12.5)  | 0.002   |
| No (n=1,060)                   |         | 87.4            | (84.7-89.6) | 92.8 | (90.0-94.8) | 89.5  | (87.5-91.2) |         |
| Smoking status                 | 11      |                 |             |      |             |       |             |         |
| Smoker (n=188)                 |         | 20.0            | (17.2-23.0) | 10.1 | (7.5-13.3)  | 16.0  | (14.0-18.2) | < 0.001 |
| Non-smoker (n=985)             |         | 80.0            | (77.0-82.8) | 89.9 | (86.7-92.5) | 84.0  | (81.8-86.0) |         |
| <b>4 Environmental factors</b> |         |                 |             |      |             |       |             |         |
| Residential area size          | 0       |                 |             |      |             |       |             |         |
| Rural (n=249)                  |         | 20.3            | (13.5-29.4) | 22.1 | (14.4-32.2) | 21    | (14.2-30.0) | 0.601   |
| Small-sized city (n=247)       |         | 20.1            | (13.3-29.1) | 22.1 | (14.4-32.3) | 20.9  | (14.0-30.0) |         |
| Medium-sized city (n=318)      |         | 26.9            | (19.0-36.7) | 26.8 | (18.5-37.0) | 26.9  | (19.1-36.3) |         |
| Metropolitan city (n=370)      |         | 32.7            | (23.7-43.1) | 29.1 | (20.4-39.7) | 31.3  | (22.7-41.4) |         |

|                                    |      |             |      |             |      |             |       |  |
|------------------------------------|------|-------------|------|-------------|------|-------------|-------|--|
| Satisfaction with residential area | 21   |             |      |             |      |             |       |  |
| Not satisfied (n=308)              | 26.1 | (22.9-29.7) | 27.0 | (23.3-31.0) | 26.5 | (23.9-29.2) | 0.733 |  |
| Satisfied (n=855)                  | 73.9 | (70.3-77.1) | 73.0 | (69.0-76.7) | 73.5 | (70.8-76.1) |       |  |

---

512

513

For peer review only

**Table 2: Bivariate associations between aerobic physical activity  $\geq$  1 day/week and potential predictor variables**

|   |                                | Aerobic physical activity $\geq$ 1 day/week |             |      |             | p-value* |
|---|--------------------------------|---------------------------------------------|-------------|------|-------------|----------|
|   |                                | No                                          |             | Yes  |             |          |
|   |                                | %                                           | 95% CI      | %    | 95% CI      |          |
| 1 | Sex                            |                                             |             |      |             |          |
|   | Women (n=622)                  | 48.7                                        | (44.7-52.7) | 51.3 | (47.3-55.3) | 0.158    |
|   | Men (n=562)                    | 44.7                                        | (40.1-49.4) | 55.3 | (50.6-59.9) |          |
|   | Age group                      |                                             |             |      |             |          |
|   | 50-60 years (n=713)            | 38.8                                        | (35.1-42.8) | 61.2 | (57.2-64.9) | < 0.001  |
|   | 61-78 years (n=471)            | 58.8                                        | (54.1-63.4) | 41.2 | (36.6-45.9) |          |
|   | Socioeconomic status           |                                             |             |      |             |          |
|   | Low (n=151)                    | 70.2                                        | (62.0-77.3) | 29.8 | (22.7-38.0) | < 0.001  |
|   | Middle (n=712)                 | 47.9                                        | (43.8-52.0) | 52.1 | (48.0-56.2) |          |
|   | High (n=307)                   | 31.9                                        | (27.0-37.3) | 68.1 | (62.7-73.0) |          |
|   | Chronic disease                |                                             |             |      |             |          |
|   | No (n=869)                     | 44.1                                        | (40.5-47.7) | 55.9 | (52.3-59.5) | 0.006    |
|   | Yes (n=312)                    | 53.8                                        | (47.6-60.0) | 46.2 | (40.0-52.4) |          |
|   | Obesity                        |                                             |             |      |             |          |
|   | Yes (n=297)                    | 53.5                                        | (47.4-59.5) | 46.5 | (40.5-52.6) | 0.005    |
|   | No (n=884)                     | 44.6                                        | (41.2-48.0) | 55.4 | (52.0-58.8) |          |
| 2 | Living with a spouse           |                                             |             |      |             |          |
|   | No (n=216)                     | 57.4                                        | (51.1-63.4) | 42.6 | (36.6-48.9) | < 0.001  |
|   | Yes (n=952)                    | 44.1                                        | (40.5-47.8) | 55.9 | (52.2-59.5) |          |
|   | Social support                 |                                             |             |      |             |          |
|   | Low (n=100)                    | 65.0                                        | (55.4-73.5) | 35.0 | (26.5-44.6) | < 0.001  |
|   | High (n=1,063)                 | 44.9                                        | (41.6-48.2) | 55.1 | (51.8-58.4) |          |
| 3 | Leisure time physical activity |                                             |             |      |             |          |
|   | Every week (n=784)             | 38.6                                        | (34.8-42.6) | 61.4 | (57.4-65.2) | < 0.001  |
|   | Not every week (n=374)         | 62.8                                        | (57.6-67.8) | 37.2 | (32.2-42.4) |          |
|   | At least one health programme  |                                             |             |      |             |          |
|   | Yes (n=124)                    | 34.7                                        | (26.7-43.6) | 65.3 | (56.4-73.3) | 0.005    |
|   | No (n=1,060)                   | 48.2                                        | (44.8-51.7) | 51.8 | (48.3-55.2) |          |
|   | Smoking status                 |                                             |             |      |             |          |
|   | Smoker (n=188)                 | 49.5                                        | (41.7-57.3) | 50.5 | (42.7-58.3) | 0.406    |
|   | Non-smoker (n=985)             | 46.0                                        | (42.5-49.5) | 54.0 | (50.5-57.5) |          |
| 4 | Residential area size          |                                             |             |      |             |          |
|   | Rural (n=249)                  | 48.6                                        | (42.1-55.1) | 51.4 | (44.9-57.9) | 0.873    |
|   | Small-sized city (n=247)       | 48.2                                        | (39.4-57.1) | 51.8 | (42.9-60.6) |          |
|   | Medium-sized city (n=318)      | 45.9                                        | (39.6-52.4) | 54.1 | (47.6-60.4) |          |

|                                    |      |             |      |             |       |
|------------------------------------|------|-------------|------|-------------|-------|
| Metropolitan city (n=370)          | 45.4 | (40.5-50.4) | 54.6 | (49.6-59.5) |       |
| Satisfaction with residential area |      |             |      |             | 0.711 |
| Not satisfied (n=308)              | 47.1 | (42.0-52.2) | 52.9 | (47.8-58.0) |       |
| Satisfied (n=855)                  | 46.0 | (42.2-49.7) | 54.0 | (50.3-57.8) |       |

\*Pearson's chi-squared test with Rao-Scott correction

1: Individual factors; 2: Interpersonal factors; 3: Behavioural factors; 4: Environmental factors

514

515

For peer review only

**Table 3: Stepwise adjusted odds ratios of aerobic physical activity at follow-up by baseline predictor variables, adults aged 65 years or older**

| Baseline variables             | Aerobic physical activity $\geq 1$ day/week |                      |             |                      |             |                      |
|--------------------------------|---------------------------------------------|----------------------|-------------|----------------------|-------------|----------------------|
|                                | Model 1                                     |                      | Model 2     |                      | Model 3     |                      |
|                                | OR                                          | 95 % CI              | OR          | 95 % CI              | OR          | 95 % CI              |
| Sex                            |                                             |                      |             |                      |             |                      |
| Women                          | 0.95                                        | (0.73 - 1.23)        | 1.01        | (0.78 - 1.32)        | 1.05        | (0.80 - 1.38)        |
| Men                            | 1.00                                        | -                    | 1.00        | -                    | 1.00        | -                    |
| Age group                      |                                             |                      |             |                      |             |                      |
| 50-60 years                    | <b>2.00</b>                                 | <b>(1.56 - 2.56)</b> | <b>1.97</b> | <b>(1.53 - 2.52)</b> | <b>1.88</b> | <b>(1.46 - 2.40)</b> |
| 61-78 years                    | 1.00                                        | -                    | 1.00        | -                    | 1.00        | -                    |
| Socioeconomic status           |                                             |                      |             |                      |             |                      |
| Low                            | 1.00                                        | -                    | 1.00        | -                    | 1.00        | -                    |
| Middle                         | <b>2.48</b>                                 | <b>(1.61 - 3.84)</b> | <b>2.39</b> | <b>(1.54 - 3.70)</b> | <b>2.08</b> | <b>(1.33 - 3.25)</b> |
| High                           | <b>4.52</b>                                 | <b>(2.83 - 7.23)</b> | <b>4.29</b> | <b>(2.67 - 6.90)</b> | <b>3.44</b> | <b>(2.11 - 5.60)</b> |
| Chronic disease                |                                             |                      |             |                      |             |                      |
| No                             | 1.25                                        | (0.92 - 1.69)        | 1.24        | (0.91 - 1.69)        | 1.21        | (0.89 - 1.66)        |
| Yes                            | 1.00                                        | -                    | 1.00        | -                    | 1.00        | -                    |
| Obesity                        |                                             |                      |             |                      |             |                      |
| No                             | 1.23                                        | (0.93 - 1.62)        | 1.24        | (0.94 - 1.63)        | 1.14        | (0.86 - 1.52)        |
| Yes                            | 1.00                                        | -                    | 1.00        | -                    | 1.00        | -                    |
| Living with a spouse           |                                             |                      |             |                      |             |                      |
| Yes                            |                                             |                      | 1.36        | (1.00 - 1.84)        | 1.31        | (0.96 - 1.79)        |
| No                             |                                             |                      | 1.00        | -                    | 1.00        | -                    |
| Social support                 |                                             |                      |             |                      |             |                      |
| High                           |                                             |                      | <b>2.11</b> | <b>(1.35 - 3.30)</b> | <b>1.98</b> | <b>(1.26 - 3.12)</b> |
| Low                            |                                             |                      | 1.00        | -                    | 1.00        | -                    |
| Leisure time physical activity |                                             |                      |             |                      |             |                      |
| Every week                     |                                             |                      |             |                      | <b>1.95</b> | <b>(1.46 - 2.60)</b> |
| Not every week                 |                                             |                      |             |                      | 1.00        | -                    |
| At least one health programme  |                                             |                      |             |                      |             |                      |
| Yes                            |                                             |                      |             |                      | 1.36        | (0.88 - 2.10)        |
| No                             |                                             |                      |             |                      | 1.00        | -                    |

Bold:  $p < 0.05$ ; OR = Odds Ratio; Model 1: Individual factors; Model 2: + interpersonal factors; Model 3: + behavioural factors

516



Figure 1: Flow diagram of participants

190x142mm (300 x 300 DPI)

### Additional File 1 – DEGS1 unit non-response analysis

**Table 1: Differences in selected baseline characteristics between DEGS1 respondents, non-respondents and deceased**

|                                | Responder |             | Non-responder |             | Deceased |             |
|--------------------------------|-----------|-------------|---------------|-------------|----------|-------------|
|                                | %         | 95% CI      | %             | 95% CI      | %        | 95% CI      |
| Total (n=2974)                 | 50.5      | (48.3-52.6) | 30.2          | (28.3-32.1) | 19.3     | (17.9-20.9) |
| Sex                            |           |             |               |             |          |             |
| Women (n=1,567)                | 52.6      | (50.2-55.0) | 59.2          | (56.0-62.5) | 42.6     | (39.0-46.3) |
| Men (n=1,407)                  | 47.4      | (45.0-49.8) | 40.8          | (37.5-44.0) | 57.4     | (53.7-61.0) |
| Age                            |           |             |               |             |          |             |
| 50-60 years (n=1,492)          | 65.2      | (62.6-67.7) | 43.2          | (39.9-46.5) | 21.7     | (18.5-25.3) |
| 61-78 years (n=1,482)          | 34.8      | (32.3-37.4) | 56.8          | (53.5-60.1) | 78.3     | (74.7-81.5) |
| Socioeconomic status           |           |             |               |             |          |             |
| Low (n=566)                    | 13.1      | (10.9-15.6) | 26.6          | (23.0-30.6) | 26.5     | (22.6-30.7) |
| Middle (n=1,709)               | 60.3      | (57.5-63.0) | 59.4          | (55.7-63.0) | 55.9     | (51.9-59.8) |
| High (n=611)                   | 26.6      | (23.6-30.0) | 14.0          | (11.3-17.0) | 17.6     | (14.2-21.6) |
| Chronical disease              |           |             |               |             |          |             |
| No (n=1,984)                   | 74.7      | (72.5-76.9) | 67.0          | (64.1-69.8) | 46.4     | (42.1-50.8) |
| Yes (n=980)                    | 25.3      | (23.1-27.5) | 33.0          | (30.2-35.9) | 53.6     | (49.2-57.9) |
| Obesity                        |           |             |               |             |          |             |
| Yes (n=860)                    | 26.1      | (23.3-29.1) | 34.0          | (30.6-37.6) | 29.8     | (25.8-34.1) |
| No (n=2,087)                   | 73.9      | (70.9-76.7) | 66.0          | (62.4-69.4) | 70.2     | (65.9-74.2) |
| Living with a spouse           |           |             |               |             |          |             |
| Yes (n=2,273)                  | 85.1      | (83.1-86.8) | 74.0          | (70.5-77.2) | 72.3     | (68.1-76.2) |
| No (n=589)                     | 14.9      | (13.2-16.9) | 26.0          | (22.8-29.5) | 27.7     | (23.8-31.9) |
| Leisure time physical activity |           |             |               |             |          |             |
| Every week (n=1,624)           | 67.6      | (64.7-70.4) | 46.5          | (42.5-50.5) | 43.8     | (39.1-48.6) |
| Not every week (n=1,231)       | 32.4      | (29.6-35.3) | 53.5          | (49.5-57.5) | 56.2     | (51.4-60.9) |

STROBE Statement—Checklist of items that should be included in reports of *cohort studies*

|                           | Item No | Recommendation                                                                                                                                                                       | Reported on page                    |
|---------------------------|---------|--------------------------------------------------------------------------------------------------------------------------------------------------------------------------------------|-------------------------------------|
| <b>Title and abstract</b> | 1       | (a) Indicate the study's design with a commonly used term in the title or the abstract                                                                                               | 1, 2                                |
|                           |         | (b) Provide in the abstract an informative and balanced summary of what was done and what was found                                                                                  | 2-3                                 |
| <b>Introduction</b>       |         |                                                                                                                                                                                      |                                     |
| Background/rationale      | 2       | Explain the scientific background and rationale for the investigation being reported                                                                                                 | 4                                   |
| Objectives                | 3       | State specific objectives, including any prespecified hypotheses                                                                                                                     | 5                                   |
| <b>Methods</b>            |         |                                                                                                                                                                                      |                                     |
| Study design              | 4       | Present key elements of study design early in the paper                                                                                                                              | 5                                   |
| Setting                   | 5       | Describe the setting, locations, and relevant dates, including periods of recruitment, exposure, follow-up, and data collection                                                      | 5-6                                 |
| Participants              | 6       | (a) Give the eligibility criteria, and the sources and methods of selection of participants. Describe methods of follow-up                                                           | 5-6                                 |
|                           |         | (b) For matched studies, give matching criteria and number of exposed and unexposed                                                                                                  | n/a                                 |
| Variables                 | 7       | Clearly define all outcomes, exposures, predictors, potential confounders, and effect modifiers. Give diagnostic criteria, if applicable                                             | 6-8                                 |
| Data sources/ measurement | 8*      | For each variable of interest, give sources of data and details of methods of assessment (measurement). Describe comparability of assessment methods if there is more than one group | 6-8                                 |
| Bias                      | 9       | Describe any efforts to address potential sources of bias                                                                                                                            | 15                                  |
| Study size                | 10      | Explain how the study size was arrived at                                                                                                                                            | 5 (see cited study protocol papers) |
| Quantitative variables    | 11      | Explain how quantitative variables were handled in the analyses. If applicable, describe which groupings were chosen and why                                                         | 6-9                                 |
| Statistical methods       | 12      | (a) Describe all statistical methods, including those used to control for confounding                                                                                                | 9                                   |
|                           |         | (b) Describe any methods used to examine subgroups and interactions                                                                                                                  | 9                                   |
|                           |         | (c) Explain how missing data were addressed                                                                                                                                          | 6                                   |
|                           |         | (d) If applicable, explain how loss to follow-up was addressed                                                                                                                       | Additional file 1                   |
|                           |         | (e) Describe any sensitivity analyses                                                                                                                                                | 15, Additional file 1               |
| <b>Results</b>            |         |                                                                                                                                                                                      |                                     |
| Participants              | 13*     | (a) Report numbers of individuals at each stage of study—eg numbers potentially eligible, examined for                                                                               | 6, Fig. 1                           |



|                          |     |                                                                                                                                                                                                              |                   |
|--------------------------|-----|--------------------------------------------------------------------------------------------------------------------------------------------------------------------------------------------------------------|-------------------|
|                          |     | eligibility, confirmed eligible, included in the study, completing follow-up, and analysed                                                                                                                   |                   |
|                          |     | (b) Give reasons for non-participation at each stage                                                                                                                                                         | Additional file 1 |
|                          |     | (c) Consider use of a flow diagram                                                                                                                                                                           | Fig. 1            |
| Descriptive data         | 14* | (a) Give characteristics of study participants (eg demographic, clinical, social) and information on exposures and potential confounders                                                                     | 9, Tab. 1         |
|                          |     | (b) Indicate number of participants with missing data for each variable of interest                                                                                                                          | Tab. 1            |
|                          |     | (c) Summarise follow-up time (eg, average and total amount)                                                                                                                                                  | 6                 |
| Outcome data             | 15* | Report numbers of outcome events or summary measures over time                                                                                                                                               | 9-10              |
| Main results             | 16  | (a) Give unadjusted estimates and, if applicable, confounder-adjusted estimates and their precision (eg, 95% confidence interval). Make clear which confounders were adjusted for and why they were included | 10, Tab. 2, 3     |
|                          |     | (b) Report category boundaries when continuous variables were categorized                                                                                                                                    | 6-8               |
|                          |     | (c) If relevant, consider translating estimates of relative risk into absolute risk for a meaningful time period                                                                                             | n/a               |
| Other analyses           | 17  | Report other analyses done—eg analyses of subgroups and interactions, and sensitivity analyses                                                                                                               | 10-11             |
| <b>Discussion</b>        |     |                                                                                                                                                                                                              |                   |
| Key results              | 18  | Summarise key results with reference to study objectives                                                                                                                                                     | 11                |
| Limitations              | 19  | Discuss limitations of the study, taking into account sources of potential bias or imprecision. Discuss both direction and magnitude of any potential bias                                                   | 15                |
| Interpretation           | 20  | Give a cautious overall interpretation of results considering objectives, limitations, multiplicity of analyses, results from similar studies, and other relevant evidence                                   | 15-16             |
| Generalisability         | 21  | Discuss the generalisability (external validity) of the study results                                                                                                                                        | 15                |
| <b>Other information</b> |     |                                                                                                                                                                                                              |                   |
| Funding                  | 22  | Give the source of funding and the role of the funders for the present study and, if applicable, for the original study on which the present article is based                                                | 18                |

\*Give information separately for exposed and unexposed groups.

**Note:** An Explanation and Elaboration article discusses each checklist item and gives methodological background and published examples of transparent reporting. The STROBE checklist is best used in conjunction with this article (freely available on the Web sites of PLoS Medicine at <http://www.plosmedicine.org/>, Annals of Internal Medicine at <http://www.annals.org/>, and Epidemiology at <http://www.epidem.com/>). Information on the STROBE Initiative is available at <http://www.strobe-statement.org>.
