# Supplementary material for: Predictors of physical activity among older adults in Germany: a nationwide cohort study
Source: PubMed Central journal article supplement — BMJ Open. 2018 May 9;8(5):e021940. doi: 10.1136/bmjopen-2018-021940 (PMC5942462; doi:10.1136/bmjopen-2018-021940), 2018-05-09
Supplement: bmjopen-2018-021940supp001.pdf [file bmjopen-2018-021940supp001.pdf]

## Additional File 1 – DEGS1 unit non-response analysis

**Table 1: Differences in selected baseline characteristics between DEGS1 respondents, non-respondents and deceased**

|                                | Responder |             | Non-responder |             | Deceased |             |
|--------------------------------|-----------|-------------|---------------|-------------|----------|-------------|
|                                | %         | 95% CI      | %             | 95% CI      | %        | 95% CI      |
| Total (n=2974)                 | 50.5      | (48.3-52.6) | 30.2          | (28.3-32.1) | 19.3     | (17.9-20.9) |
| Sex                            |           |             |               |             |          |             |
| Women (n=1,567)                | 52.6      | (50.2-55.0) | 59.2          | (56.0-62.5) | 42.6     | (39.0-46.3) |
| Men (n=1,407)                  | 47.4      | (45.0-49.8) | 40.8          | (37.5-44.0) | 57.4     | (53.7-61.0) |
| Age                            |           |             |               |             |          |             |
| 50-60 years (n=1,492)          | 65.2      | (62.6-67.7) | 43.2          | (39.9-46.5) | 21.7     | (18.5-25.3) |
| 61-78 years (n=1,482)          | 34.8      | (32.3-37.4) | 56.8          | (53.5-60.1) | 78.3     | (74.7-81.5) |
| Socioeconomic status           |           |             |               |             |          |             |
| Low (n=566)                    | 13.1      | (10.9-15.6) | 26.6          | (23.0-30.6) | 26.5     | (22.6-30.7) |
| Middle (n=1,709)               | 60.3      | (57.5-63.0) | 59.4          | (55.7-63.0) | 55.9     | (51.9-59.8) |
| High (n=611)                   | 26.6      | (23.6-30.0) | 14.0          | (11.3-17.0) | 17.6     | (14.2-21.6) |
| Chronic disease                |           |             |               |             |          |             |
| No (n=1,984)                   | 74.7      | (72.5-76.9) | 67.0          | (64.1-69.8) | 46.4     | (42.1-50.8) |
| Yes (n=980)                    | 25.3      | (23.1-27.5) | 33.0          | (30.2-35.9) | 53.6     | (49.2-57.9) |
| Obesity                        |           |             |               |             |          |             |
| Yes (n=860)                    | 26.1      | (23.3-29.1) | 34.0          | (30.6-37.6) | 29.8     | (25.8-34.1) |
| No (n=2,087)                   | 73.9      | (70.9-76.7) | 66.0          | (62.4-69.4) | 70.2     | (65.9-74.2) |
| Living with a spouse           |           |             |               |             |          |             |
| Yes (n=2,273)                  | 85.1      | (83.1-86.8) | 74.0          | (70.5-77.2) | 72.3     | (68.1-76.2) |
| No (n=589)                     | 14.9      | (13.2-16.9) | 26.0          | (22.8-29.5) | 27.7     | (23.8-31.9) |
| Leisure time physical activity |           |             |               |             |          |             |
| Every week (n=1,624)           | 67.6      | (64.7-70.4) | 46.5          | (42.5-50.5) | 43.8     | (39.1-48.6) |
| Not every week (n=1,231)       | 32.4      | (29.6-35.3) | 53.5          | (49.5-57.5) | 56.2     | (51.4-60.9) |
